# Supplementary material
Source: PubMed Central journal article supplement (PMC4106467)
Supplement: NIHMS595180-supplement-000412_-_Supplemental_Material.pdf [file NIHMS595180-supplement-000412_-_Supplemental_Material.pdf]

## SUPPLEMENTAL MATERIAL

### UKCVD

The **HIFMECH** study comprises Caucasian male survivors of a first MI aged <60 years (excluding patients with FH and insulin-dependent diabetes mellitus) and population-based individuals of the same age and region recruited from four centres in Europe: Stockholm, Sweden and London, England for the North and Marseille, France and San Giovanni Retondo, Italy representing the South [1]. In all, a total of 598 post infarction patients and 653 controls were included in the study. Patients and control subjects were examined in parallel in the early morning after an overnight fast. Post-infarction patients were investigated 3 to 6 months after the acute event. Blood samples were obtained from the antecubital vein after an overnight fast, collected into citrate (3.8% citrate, 0.129 mol/L) and centrifuged at 2500g for 30 minutes at 4°C.

The **Simon Broome** study is a cross-sectional study comprising 410 Caucasian patients with treated heterozygous FH aged 18 years recruited from 6 lipid clinics in the UK. Recruitment methods, inclusion and exclusion and diagnostic criteria were as defined [2, 3]. CAD was documented in 104 of the 211 men and in 55 of the 199 women with mean ages of onset of 43.1 and 46.5 years, respectively.

**University College London Diabetes and Cardiovascular disease Study (UDACS):** UDACS is a cross-sectional sample of diabetes patients designed to study the association between common genetic variants and biochemical risk factors implicated in coronary heart disease (CHD) in patients with diabetes. It comprises of 1014 subjects consecutively recruited from the diabetes clinic at UCL Hospitals in 2001–2. All patients had diabetes according to WHO criteria and analysis was restricted to subjects with T2D with telomere length measurement data (N=742). The full characteristics of patients have been reported previously [4].

**The European Atherosclerosis Research Study (EARS) II** was undertaken to compare postprandial responses (oral glucose tolerance test [OGTT] and oral fat tolerance test [OFTT]) of male case subjects (n=407) between 18 and 28 years old whose father had a proven myocardial infarction before the age of 55 years and male control subjects (n=415) who were age-matched and were recruited irrespective of family history. The subjects were recruited from 14 European university student populations from 11 European countries, which were divided into 4 regions: Baltic (Estonia and Finland); United Kingdom; Middle Europe (Belgium, Denmark, Germany, and Switzerland); and South Europe (Greece, Italy, Portugal and Spain). The study design has been described previously [5].

## **UKTWIN**

The UKTWIN cohort consisted of a group of twins ascertained to study the heritability and genetics of age-related diseases (<http://www.twinsuk.ac.uk/>). These unselected twins were recruited from the general population through national media campaigns in the UK and shown to be comparable to age-matched population singletons in terms of disease related and lifestyle characteristics [6]

## **NHS**

The NHS is a prospective cohort study of 121,700 female registered nurses in 11 states in the United States who were 30-55 years of age at enrollment. In 1976 and biennially thereafter, detailed information from participants was collected by self-administered questionnaires. Participants in this study were selected for a nested case-control study of telomere length and postmenopausal breast cancer risk from the subcohort of 32,826 women who donated a blood sample in 1989-90 [7]. Eligible cases consisted of postmenopausal women of European ancestry with pathologically confirmed incident invasive breast cancer diagnosed anytime after blood collection up to June 1, 2004 with no prior diagnosis of cancer. Controls were randomly selected postmenopausal women free of cancer and matched to cases according to age, blood collection, and ethnicity. Completion of the questionnaire and submission of the blood sample was considered to imply informed consent. No significant difference was observed for log relative telomere length between 1,122 cases and 1,147 controls and no significant association with postmenopausal breast cancer risk [9]; therefore, we included telomere length data from both breast cancer cases and controls for the current study [8].

## **PLCO**

The PLCO Cancer Screening Trial is an ongoing randomized trial with 154,942 persons aged 55 to 74 enrolled between September 1993 and July 2001 from 10 screening centers nationwide [9]. Detailed questionnaire data was collected from all subjects at baseline. Participants provided blood and tissue samples for etiologic studies of cancer [10] and all participants provided written informed consent. Participants in this study were male subjects selected for a nested case-control study of telomere length, prostate cancer risk, and life-style variables [11]. Eligible cases and controls consisted of non-Hispanic white men aged 55 to 74 who had been screened for prostate cancer (PSA test) prior to October 1, 2003, completed a baseline questionnaire of cancer risk factors, provided a blood sample 1 month to 3 years prior to prostate cancer diagnosis for cases, and did not have a personal history of cancer prior to study entry. All cases had pathologically confirmed incident aggressive prostate cancer and a Gleason

score of  $\geq 7$ . No significant difference was observed for relative telomere length between 616 cases and 1,061 matched controls and no significant association with aggressive prostate cancer risk [11]; therefore, we included telomere length data from both prostate cancer cases and controls for the current study.

## **MDACC**

MD Anderson Cancer Center study included controls recruited from 3 independent case-control studies in lung, bladder, and kidney cancer. Detailed information on study population has been described previously. Controls were healthy individuals without a prior history of cancer (except nonmelanoma skin cancer) recruited from Kelsey-Seybold Clinic (Houston, TX) for lung and bladder studies and via random digit dialing in Texas for kidney study. Trained MD Anderson interviewers collected epidemiologic and demographic data through in-person interviews [12].

## **STUDY ACKNOWLEDGEMENTS**

### **Funding and Resources**

#### **UKCVD**

The **HIFMECH** study was supported by the European Commission (BMH4-CT96-0272), the Swedish Medical Research Council, the Swedish heart-lung Foundation, INSERM, and Université de la Méditerranée (INSERM U626), Fondation pour la Recherche Médicale (FRM) and Programme Hospitalier de Recherche Clinique (PHRC 1996). HIFMECH co-investigators are Anders Hamsten, Steve E. Humphries, Irène Juhan-Vague, Maurizio Margaglione, Giovanni di Minno, John Yudkin, Elena Tremoli. CM is supported by the Binks Trust. The **Simon Broome** study was supported by a grant from the British Heart Foundation (grant RG93008). **UDACS** was supported by Diabetes UK. **EARSII** was supported by the European Community (EU-Biomed 2 BMG4-98-3324).

#### **UKTWIN**

The study was funded by the Wellcome Trust; European Community's Seventh Framework Programme (FP7/2007-2013), ENGAGE project grant agreement (HEALTH-F4-2007-201413). The study also receives support from the Dept of Health via the National Institute for Health Research (NIHR) comprehensive Biomedical Research Centre award to Guy's & St Thomas' NHS Foundation Trust in partnership with King's College London. TDS is an NIHR senior Investigator and is holder of an ERC Advanced Principal

Investigator award. Genotyping was performed by The Wellcome Trust Sanger Institute, support of the National Eye Institute via an NIH/CIDR genotyping project.

### **NHS**

The Nurses' Health Study was supported by National Institutes of Health grants: CA87969, CA49449, CA065725, CA133914, and U01-CA98233. We would like to thank the participants and staff of the Nurses' Health Study for their valuable contributions as well as the following state cancer registries for their help: AL, AZ, AR, CA, CO, CT, DE, FL, GA, ID, IL, IN, IA, KY, LA, ME, MD, MA, MI, NE, NH, NJ, NY, NC, ND, OH, OK, OR, PA, RI, SC, TN, TX, VA, WA, WY. In addition, this study was approved by the Connecticut Department of Public Health (DPH) Human Investigations Committee. Certain data used in this publication were obtained from the DPH.

### **PLCO**

We thank the staff of the Prostate, Lung, Colorectal, and Ovarian (PLCO) Cancer Screening Trial, and acknowledge the study participants for their contributions. This PLCO TL work was supported in part by the Intramural Research Program of the NIH, National Cancer Institute, Division of Cancer Epidemiology and Genetics.

### **MDACC**

This study was supported by NIH grants CA74880, CA91846, CA127615, CA131335, CA121197, UT MD Anderson Cancer Centre Research Trust (X.W.), Centre for Translational and Public Health Genomics at MD Anderson Cancer Center.

### **SUPPLEMENTARY REFERENCES-**

[1] Juhan-Vague I, Morange PE, Aubert H, Henry M, Aillaud MF, Alessi MC, Samnegard A, Hawe E, Yudkin J, Margaglione M, Di Minno G, Hamsten A, Humphries SE (2002) Plasma thrombin-activatable fibrinolysis inhibitor antigen concentration and genotype in relation to myocardial infarction in the North and South of Europe. *Arteriosclerosis Thrombosis and Vascular Biology* 22:867-873

[2] Risk of fatal coronary heart disease in familial hypercholesterolaemia. Scientific Steering Committee on behalf of the Simon Broome Register Group. *B M J* 1991; 303:893-896.

- [3] Neil HA, Seagroatt V, Betteridge DJ, Cooper MP, Durrington PN, Miller JP, Seed M, Naoumova RP, Thompson GR, Huxley R, and Humphries SE. Established and emerging coronary risk factors in patients with heterozygous familial hypercholesterolaemia. *Heart* 2004; 90:1431-1437.
- [4] Stephens JW, Hurel SJ, Cooper JA, Acharya J, Miller GJ, Humphries SE. A common functional variant in the interleukin-6 gene is associated with increased body mass index in subjects with type 2 diabetes mellitus. *Molecular genetics and metabolism*. 2004; 82(2):180-186.
- [5] EARS group. The European Atherosclerosis Research Study: design and objectives. *Int J Epidemiol*. 1994; 23:472– 481.
- [6] Alireza Moayyeri, Christopher J. Hammond, Deborah J. Hart and Timothy D. Spector The UK Adult Twin Registry (TwinsUK Resource). Twin Research and Human Genetics, Available on CJO 202 doi:10.1017/thg.2012.89
- [7] De Vivo 2009 CEBP vol 18, p1152
- [8] Prescott et al. Genome-Wide Association Study of Relative Telomere Length 2011 PLoS One vol 6, pg. e19635
- [9] Prorok 2000 Control Clin Trials vol 21, p273S
- [10] Gohagan 2000 Control Clin Trials vol 21, p251S
- [11] Mirabello et al. 2009, The association between leukocyte telomere length and cigarette smoking, dietary and physical variables, and risk of prostate cancer. *Aging Cell*. Aug;8(4):405-13.
- [12] Gu J et al. A genome-wide association study identifies a locus on chromosome 14q21 as a predictor of leukocyte telomere length and as a marker of susceptibility for bladder cancer. *Cancer Prev Res (Phila)*. 2011 Apr; 4(4):514-21

**Supplementary Table 1: AIDHS/SDS discovery and replication (Stage 1), Stage 2, and Stage 3 study cohorts (N=16,998)**

| Study          | Ethnic Group | Replication Stage | Replication | Total (N) |
|----------------|--------------|-------------------|-------------|-----------|
| AIDHS/SDS GWAS | Punjabi Sikh | Discovery Stage 1 | -           | 1616      |
| AIDHS/SDS      | Punjabi Sikh | Stage 1           |             | 2397      |
| UKCVD          | CE           | Stage 2           |             | 2952      |
| UKTWIN         | CE           | Stage 3           | Look-up     | 4899      |
| NHS            | CE           | Stage 3           | Look-up     | 1944      |
| PLCO           | CE           | Stage 3           | Look-up     | 1610      |
| MDACC          | CE           | Stage 3           | Look-up     | 1580      |

**Supplementary Table 2A: Clinical characteristics of Punjabi Sikh Discovery and Stage 1 Replication (N= 4013)**

|                                 | AIDS/SDS     |              | <i>P</i> |
|---------------------------------|--------------|--------------|----------|
|                                 | DISCOVERY    | STAGE 1      |          |
| <b>N</b>                        | 1616         | 2397         |          |
| <b>Age (yrs)</b>                | 53.1 (12.2)  | 51.2 (13.8)  | 5.2E-01  |
| <b>Gender (% males)</b>         | 53.0         | 57.0         | 2.5E-01  |
| <b>SYBP (mmHg)</b>              | 139 (23.4)   | 143.5 (12.1) | 8.6E-01  |
| <b>DYSBP (mmHg)</b>             | 83.6 (12.8)  | 83 (12.3)    | 9.7E-01  |
| <b>BMI (kg/m<sup>2</sup>)</b>   | 26.8 (5.0)   | 26.8 (11.3)  | 8.1E-01  |
| <b>Waist (cm)</b>               | 93.7 (11.9)  | 92.1 (12.2)  | 9.2E-01  |
| <b>WHR</b>                      | 0.95 (0.08)  | 0.94 (0.09)  | 9.3E-01  |
| <b>FBG (mg/dL)</b>              | 123.3 (47.6) | 127.7 (50.4) | 9.5E-01  |
| <b>HOMA-IR</b>                  | 2.1 (1.9)    | 2.1 (2.0)    | 9.1E-01  |
| <b>%T2D</b>                     | 52           | 46           | 6.2E-01  |
| <b>% CHD</b>                    | 11           | 21           | 3.4E-02  |
| <b>Relative Telomere Length</b> | 1.95 (0.47)  | 1.04 (0.68)  | 2.7E-02  |

SYBP- systolic blood pressure, DYSBP-diastolic blood pressure, BMI-body mass index, WHR-waist to hip ratio, FBG-fasting blood glucose, T2D-type II diabetes, CHD-Coronary Heart Disease, HOMA-IR-Homeostatic Model Assessment-Insulin Resistance

Values in parentheses are geometric mean and SD.

Supplementary Table 2B: Clinical characteristics of AIDS/SDS and other populations (N=16,998)

|                                            | AIDS/SDS     | UKCVD            | P       | UKTWIN             | P       | NHS                | P       | PLCO            | P       | MDACC       | P       |
|--------------------------------------------|--------------|------------------|---------|--------------------|---------|--------------------|---------|-----------------|---------|-------------|---------|
|                                            | N=4013       | N=2952           |         | N=4899             |         | N=1944             |         | N=1610          |         | N=1580      |         |
| <b>Age</b>                                 | 51.9 (13.4)  | 51.6 (5.4)       | 9.5E-01 | 51.02 (13.2)       | 2.1E-01 | 58.5 (6.4)         | 9E-01   | 63.9 (5.0)      | 4E-01   | 62.7 (10.7) | 5.2E-01 |
| <b>N-Males (%)</b>                         | 2219 (55.3)  | 2488 (84.2)      |         | 440 (9.0)          |         | 0 (0)              |         | 1610 (100)      |         | 1139 (72.1) |         |
| <b>BMI (Kg/m<sup>2</sup>)</b>              | 26.8 (8.7)   | 26.6 (3.3)       | 1.8E-01 | 25.4 (4.7)         | 8.8E-01 | -                  |         | -               |         | 27.6 (0.2)  | 9.2E-01 |
| <b>SYBP (mmHg)</b>                         | 141.4 (17.3) | 127.9 (15.7)     | 5.6E-01 | 122.7(15.9)        | 4.2E-01 | -                  |         |                 |         | -           |         |
| <b>N-Current Smokers (%)</b>               | -            | 259 (23.7)       |         | 756 (15.4)         |         | 258 (13.3)         |         | 160 (9.9)       |         | 295 (18.7)  |         |
| <b>N-CHD (%)</b>                           | 678 (16.9)   | 527 (48.3)       | 6.9E-11 | -                  |         | -                  |         | -               |         | -           |         |
| <b>Relative Telomere Length (COMBINED)</b> | 1.33 (0.78)  | 1.19 (0.37)      | 8.7E-01 | 3.71 (0.69)        | 4.3E-04 | 2.79 (0.35)        | 4.6E-02 | 2.58 (0.56)     | 2.5E-01 | 1.20 (0.40) | 7.4E-01 |
| <b>Relative Telomere Length (HEALTHY)</b>  | 1.67 (0.49)  | 1.28 (0.66)      |         | 3.46 (0.61)        |         | 2.82(0.37)         |         | 2.55(0.65)      |         | 1.37(0.31)  |         |
| <b>N (HEALTHY)</b>                         | 1762         | 130 (Males only) |         | 119 (Females only) |         | 182 (Females only) |         | 62 (Males only) |         | 82          |         |

BMI- Body Mass Index, SYBP- Systolic Blood Pressure, CHD- Coronary Heart Disease Values in parentheses are geometric mean and SD, HEALTHY- non-smokers, non-drinkers.



**Supplementary Table 3: Primers used to measure relative telomere length**

| SINGLE COPY GENE |                               |
|------------------|-------------------------------|
| 36b4F            | 5'CAGCAAGTGGGAAGGTGTAATCC3'   |
| 36b4R            | 5'CCCATTCTATCATCAACGGGTACAA3' |

| TELOMERE |                                             |
|----------|---------------------------------------------|
| tel1F    | 5'GGTTTTTGAGGGTGAGGGTGAGGGTGAGGGTGAGGGT3'   |
| tel2R    | 5'TCCCGACTATCCCTATCCCTATCCCTATCCCTATCCCTA3' |

Reference: Cawthon RM. Telomere measurement by quantitative pcr. Nucleic Acids Res 2002; 30:e47.

Supplementary Table 4: Punjabi Sikh Initial Discovery Analysis

| SNP         | Chr | Position | GENE     | Strand | Genotyped | Info    | effect_allele | base_allele | freq_effect | BETA     | SE       | P        | N       | HWE      |
|-------------|-----|----------|----------|--------|-----------|---------|---------------|-------------|-------------|----------|----------|----------|---------|----------|
| 16-58234260 | 16  | 58234260 | CSNK2A2  | +      | 0         | 0.92405 | GA            | G           | 0.179888    | -0.46998 | 0.089254 | 1.40E-07 | 1478.93 | 0.18537  |
| rs11076223  | 16  | 58239558 | CSNK2A2  | +      | 0         | 0.8797  | G             | T           | 0.174177    | -0.48376 | 0.092736 | 1.82E-07 | 1478.99 | 0.20524  |
| rs8058372   | 16  | 58238081 | CSNK2A2  | +      | 0         | 0.90006 | A             | C           | 0.17595     | -0.4752  | 0.091274 | 1.93E-07 | 1478.93 | 0.20847  |
| rs1834021   | 16  | 58234767 | CSNK2A2  | +      | 0         | 0.93393 | C             | T           | 0.176221    | -0.46637 | 0.089581 | 1.93E-07 | 1478.95 | 0.2086   |
| rs7196068   | 16  | 58234135 | CSNK2A2  | +      | 0         | 0.93805 | A             | G           | 0.176559    | -0.46464 | 0.08931  | 1.97E-07 | 1478.92 | 0.20956  |
| rs58553914  | 16  | 58233709 | CSNK2A2  | +      | 0         | 0.93331 | C             | T           | 0.176378    | -0.46501 | 0.089591 | 2.10E-07 | 1479    | 0.20956  |
| rs73549172  | 16  | 58181055 | CSNK2A2  | +      | 0         | 0.99137 | A             | G           | 0.186092    | -0.44222 | 0.085524 | 2.33E-07 | 1479    | 0.3898   |
| 16-58139084 | 16  | 58139084 |          | +      | 0         | 0.86028 | A             | AC          | 0.157648    | -0.50124 | 0.097234 | 2.54E-07 | 1478.91 | 0.14033  |
| 16-58240273 | 16  | 58240273 |          | +      | 0         | 0.86692 | C             | CTTTAT      | 0.165057    | -0.49055 | 0.095301 | 2.64E-07 | 1478.99 | 0.18512  |
| rs11860708  | 16  | 58178596 | CSNK2A2  | +      | 1         | 1       | A             | G           | 0.186613    | -0.43861 | 0.085233 | 2.66E-07 | 1479    | 0.44087  |
| 16-58179843 | 16  | 58179843 | CSNK2A2  | +      | 0         | 0.99278 | C             | CA          | 0.185765    | -0.43905 | 0.085504 | 2.82E-07 | 1479    | 0.38871  |
| rs58588258  | 16  | 58189271 | CSNK2A2  | +      | 0         | 0.9929  | A             | C           | 0.18233     | -0.44142 | 0.086025 | 2.88E-07 | 1478.99 | 0.29605  |
| rs7185651   | 16  | 58187826 | CSNK2A2  | +      | 0         | 0.99314 | G             | A           | 0.182366    | -0.44118 | 0.086027 | 2.92E-07 | 1479    | 0.38132  |
| rs59165986  | 16  | 58186952 | CSNK2A2  | +      | 0         | 0.99331 | T             | C           | 0.182386    | -0.44101 | 0.086028 | 2.95E-07 | 1479.01 | 0.38132  |
| rs8044707   | 16  | 58240972 | CSNK2A2  | +      | 0         | 0.83798 | T             | C           | 0.159785    | -0.50274 | 0.098269 | 3.12E-07 | 1478.95 | 0.20705  |
| rs111234535 | 16  | 58137426 | C16orf80 | +      | 0         | 0.83258 | A             | G           | 0.1428      | -0.52768 | 0.10353  | 3.45E-07 | 1478.95 | 0.28666  |
| rs77762167  | 16  | 58141185 | C16orf80 | +      | 0         | 0.88594 | G             | T           | 0.160847    | -0.47695 | 0.095018 | 5.18E-07 | 1478.95 | 0.12263  |
| rs74019786  | 16  | 58141441 | C16orf80 | +      | 0         | 0.88824 | G             | A           | 0.161014    | -0.47564 | 0.094855 | 5.32E-07 | 1478.96 | 0.12263  |
| rs74019790  | 16  | 58141827 | C16orf80 | +      | 0         | 0.89149 | C             | T           | 0.161436    | -0.47352 | 0.0946   | 5.57E-07 | 1478.98 | 0.14729  |
| rs74019791  | 16  | 58141882 | C16orf80 | +      | 0         | 0.89214 | G             | A           | 0.161297    | -0.47333 | 0.094581 | 5.60E-07 | 1478.96 | 0.14729  |
| rs74019792  | 16  | 58141933 | C16orf80 | +      | 0         | 0.89256 | A             | G           | 0.161331    | -0.47309 | 0.094552 | 5.63E-07 | 1478.93 | 0.14729  |
| rs78955299  | 16  | 58141203 | C16orf80 | +      | 0         | 0.88065 | T             | C           | 0.161021    | -0.4764  | 0.095259 | 5.70E-07 | 1478.98 | 0.12263  |
| rs55990878  | 16  | 58142126 | C16orf80 | +      | 0         | 0.89428 | C             | T           | 0.161455    | -0.47219 | 0.094432 | 5.72E-07 | 1478.94 | 0.14729  |
| rs60765503  | 16  | 58144761 | C16orf80 | +      | 0         | 0.91474 | G             | A           | 0.161872    | -0.46577 | 0.093272 | 5.92E-07 | 1478.96 | 0.12392  |
| rs2098713   | 5   | 37144574 | C5orf42  | +      | 1         | 0.99904 | T             | C           | 0.470588    | -0.33379 | 0.066939 | 6.15E-07 | 1479.01 | 0.75422  |
| rs74019794  | 16  | 58144179 | C16orf80 | +      | 0         | 0.91168 | C             | G           | 0.161758    | -0.46544 | 0.093449 | 6.34E-07 | 1478.96 | 0.12392  |
| rs61535084  | 16  | 58143889 | C16orf80 | +      | 0         | 0.90953 | G             | T           | 0.161949    | -0.46549 | 0.093518 | 6.44E-07 | 1478.92 | 0.12392  |
| rs113577652 | 16  | 58232261 |          | +      | 0         | 0.93279 | A             | C           | 0.165544    | -0.45379 | 0.091168 | 6.44E-07 | 1478.98 | 0.072531 |
| rs76411253  | 5   | 1.08E+08 | FER      | +      | 0         | 0.80217 | A             | G           | 0.077956    | 0.70129  | 0.1409   | 6.46E-07 | 1478.95 | 0.58828  |
| rs10445026  | 16  | 58143253 | C16orf80 | +      | 0         | 0.90477 | G             | A           | 0.162145    | -0.46641 | 0.093722 | 6.47E-07 | 1478.91 | 0.12481  |
| rs74019793  | 16  | 58144117 | C16orf80 | +      | 0         | 0.90114 | G             | A           | 0.163483    | -0.46385 | 0.093584 | 7.18E-07 | 1478.89 | 0.10581  |
| rs57827735  | 16  | 58144938 | C16orf80 | +      | 0         | 0.92214 | C             | T           | 0.162169    | -0.4599  | 0.092798 | 7.20E-07 | 1478.94 | 0.12402  |
| rs75241789  | 16  | 58224666 | CSNK2A2  | +      | 0         | 0.98153 | A             | G           | 0.171146    | -0.4346  | 0.087918 | 7.69E-07 | 1478.95 | 0.098147 |
| rs149021498 | 16  | 58231487 | CSNK2A2  | +      | 0         | 0.96706 | A             | G           | 0.165296    | -0.4439  | 0.089837 | 7.76E-07 | 1478.93 | 0.1074   |
| rs74019837  | 16  | 58231266 | CSNK2A2  | +      | 0         | 0.96862 | T             | C           | 0.165424    | -0.44336 | 0.089735 | 7.78E-07 | 1478.93 | 0.10811  |
| rs77325010  | 16  | 58230324 | CSNK2A2  | +      | 0         | 0.97569 | G             | A           | 0.165989    | -0.44056 | 0.089276 | 8.03E-07 | 1478.96 | 0.10943  |
| rs57474112  | 16  | 58228856 | CSNK2A2  | +      | 0         | 0.98667 | G             | A           | 0.166865    | -0.4362  | 0.088575 | 8.45E-07 | 1479.03 | 0.091713 |
| rs55691416  | 16  | 58228735 | CSNK2A2  | +      | 0         | 0.98752 | C             | G           | 0.166942    | -0.43587 | 0.088521 | 8.48E-07 | 1479.02 | 0.091713 |
| rs74019833  | 16  | 58219939 | CSNK2A2  | +      | 0         | 0.99846 | C             | T           | 0.167861    | -0.4314  | 0.08785  | 9.08E-07 | 1478.95 | 0.11173  |
| 16-58239268 | 16  | 58239268 |          | +      | 0         | 0.88625 | AT            | A           | 0.160108    | -0.46605 | 0.094926 | 9.12E-07 | 1478.94 | 0.080403 |
| rs3743578   | 16  | 58217799 | CSNK2A2  | +      | 0         | 0.99869 | T             | C           | 0.1678      | -0.43121 | 0.087848 | 9.17E-07 | 1478.99 | 0.11173  |
| rs16959780  | 16  | 58217759 | CSNK2A2  | +      | 0         | 0.99869 | A             | T           | 0.167798    | -0.43121 | 0.087848 | 9.17E-07 | 1478.98 | 0.11173  |
| rs61667621  | 16  | 58217564 | CSNK2A2  | +      | 0         | 0.99869 | C             | T           | 0.1678      | -0.43119 | 0.087848 | 9.18E-07 | 1478.99 | 0.11173  |
| rs301869    | 5   | 37140597 | C5orf42  | +      | 0         | 0.97887 | A             | T           | 0.474587    | -0.33489 | 0.068235 | 9.20E-07 | 1478.95 | 0.71505  |
| rs12149696  | 16  | 58215752 | CSNK2A2  | +      | 0         | 0.99873 | C             | G           | 0.167824    | -0.43102 | 0.087843 | 9.26E-07 | 1478.95 | 0.11173  |

|             |    |          |           |   |   |         |     |    |          |          |          |          |         |          |
|-------------|----|----------|-----------|---|---|---------|-----|----|----------|----------|----------|----------|---------|----------|
| 16-58193808 | 16 | 58193808 | CSNK2A2   | + | 0 | 0.98885 | G   | GT | 0.168759 | -0.43288 | 0.088344 | 9.59E-07 | 1478.99 | 0.13736  |
| rs112480836 | 16 | 58232237 | CSNK2A2   | + | 0 | 0.95553 | A   | C  | 0.161282 | -0.44527 | 0.091048 | 1.01E-06 | 1478.92 | 0.067025 |
| rs301872    | 5  | 37137858 | C5orf42   | + | 0 | 0.97429 | G   | C  | 0.475614 | -0.33489 | 0.068504 | 1.02E-06 | 1478.94 | 0.60236  |
| rs74019829  | 16 | 58209316 | CSNK2A2   | + | 0 | 0.99967 | C   | T  | 0.167977 | -0.42908 | 0.08778  | 1.02E-06 | 1478.97 | 0.11173  |
| rs117382243 | 16 | 58224034 | CSNK2A2   | + | 0 | 0.98661 | T   | A  | 0.164562 | -0.43666 | 0.089332 | 1.02E-06 | 1478.96 | 0.12978  |
| rs117776647 | 16 | 58224035 | CSNK2A2   | + | 0 | 0.98661 | C   | A  | 0.164562 | -0.43666 | 0.089332 | 1.02E-06 | 1478.96 | 0.12978  |
| rs74019828  | 16 | 58209274 | CSNK2A2   | + | 0 | 0.99968 | A   | G  | 0.167977 | -0.42907 | 0.087779 | 1.02E-06 | 1478.97 | 0.11173  |
| rs1875525   | 16 | 58201849 | CSNK2A2   | + | 1 | 0.9827  | T   | C  | 0.16802  | -0.4294  | 0.087854 | 1.02E-06 | 1478.96 | 0.024991 |
| rs1875524   | 16 | 58201931 | CSNK2A2   | + | 0 | 0.99997 | C   | T  | 0.16801  | -0.42862 | 0.087762 | 1.04E-06 | 1478.96 | 0.092897 |
| rs1875523   | 16 | 58202084 | CSNK2A2   | + | 0 | 0.99997 | T   | A  | 0.16801  | -0.42862 | 0.087762 | 1.04E-06 | 1478.96 | 0.092897 |
| rs112724982 | 16 | 58203280 | CSNK2A2   | + | 0 | 0.99997 | G   | A  | 0.16801  | -0.42862 | 0.087762 | 1.04E-06 | 1478.96 | 0.092897 |
| rs74019824  | 16 | 58206406 | CSNK2A2   | + | 0 | 0.99997 | G   | T  | 0.16801  | -0.42862 | 0.087762 | 1.04E-06 | 1478.96 | 0.092897 |
| 16-58197412 | 16 | 58197412 | CSNK2A2   | + | 0 | 0.99336 | TAC | T  | 0.168496 | -0.43014 | 0.088078 | 1.04E-06 | 1478.95 | 0.13618  |
| rs1875522   | 16 | 58202107 | CSNK2A2   | + | 1 | 0.99814 | T   | C  | 0.168022 | -0.42863 | 0.087773 | 1.04E-06 | 1478.96 | 0.092897 |
| rs113103741 | 16 | 58225498 | CSNK2A2   | + | 0 | 0.9579  | C   | G  | 0.167283 | -0.44103 | 0.090432 | 1.08E-06 | 1479    | 0.2624   |
| rs1393203   | 16 | 58207203 | CSNK2A2   | + | 1 | 0.99936 | C   | A  | 0.168016 | -0.42745 | 0.087653 | 1.08E-06 | 1479.04 | 0.07653  |
| rs59804790  | 16 | 58216261 | CSNK2A2   | + | 0 | 0.99335 | G   | A  | 0.170365 | -0.42767 | 0.08777  | 1.10E-06 | 1478.95 | 0.14     |
| rs74989935  | 16 | 58224042 | CSNK2A2   | + | 0 | 0.99707 | A   | G  | 0.169031 | -0.42753 | 0.087789 | 1.12E-06 | 1478.99 | 0.11432  |
| rs74019835  | 16 | 58222531 | CSNK2A2   | + | 0 | 0.99709 | C   | G  | 0.169004 | -0.42752 | 0.08779  | 1.12E-06 | 1479.02 | 0.11432  |
| rs74019834  | 16 | 58222102 | CSNK2A2   | + | 0 | 0.99709 | G   | A  | 0.169004 | -0.42752 | 0.08779  | 1.12E-06 | 1479.02 | 0.11432  |
| rs74019836  | 16 | 58224062 | CSNK2A2   | + | 0 | 0.99685 | C   | A  | 0.168959 | -0.42755 | 0.087811 | 1.12E-06 | 1479.01 | 0.13633  |
| rs76255078  | 16 | 58216428 | CSNK2A2   | + | 0 | 0.99702 | T   | C  | 0.16896  | -0.4275  | 0.087801 | 1.12E-06 | 1478.99 | 0.13633  |
| rs74019832  | 16 | 58219280 | CSNK2A2   | + | 0 | 0.99738 | A   | T  | 0.168997 | -0.42717 | 0.087779 | 1.14E-06 | 1478.99 | 0.11432  |
| rs74019831  | 16 | 58218489 | CSNK2A2   | + | 0 | 0.99738 | A   | G  | 0.168997 | -0.42716 | 0.087779 | 1.14E-06 | 1478.99 | 0.11432  |
| rs16959778  | 16 | 58217701 | CSNK2A2   | + | 0 | 0.99737 | C   | T  | 0.168999 | -0.42715 | 0.087779 | 1.14E-06 | 1479    | 0.11432  |
| rs11076224  | 16 | 58239644 | CSNK2A2   | + | 0 | 0.89976 | C   | A  | 0.155136 | -0.4635  | 0.095252 | 1.14E-06 | 1478.95 | 0.058462 |
| rs16942468  | 16 | 58217323 | CSNK2A2   | + | 0 | 0.99738 | C   | T  | 0.168999 | -0.42712 | 0.087779 | 1.14E-06 | 1479    | 0.11432  |
| 16-58216075 | 16 | 58216075 | CSNK2A2   | + | 0 | 0.99736 | GA  | G  | 0.169022 | -0.427   | 0.087777 | 1.15E-06 | 1478.95 | 0.11432  |
| rs58770507  | 16 | 58190770 | CSNK2A2   | + | 0 | 0.992   | T   | G  | 0.168522 | -0.42926 | 0.088269 | 1.16E-06 | 1479    | 0.16348  |
| rs61268955  | 16 | 58214346 | CSNK2A2   | + | 0 | 0.99737 | C   | T  | 0.169033 | -0.42671 | 0.087775 | 1.17E-06 | 1479    | 0.11511  |
| 16-58187598 | 16 | 58187598 |           | + | 0 | 0.99185 | CT  | C  | 0.168609 | -0.42895 | 0.088297 | 1.19E-06 | 1479    | 0.19231  |
| 16-58187595 | 16 | 58187595 |           | + | 0 | 0.99186 | AC  | A  | 0.168611 | -0.42894 | 0.088297 | 1.19E-06 | 1479.01 | 0.19231  |
| rs113236023 | 16 | 58186446 | CSNK2A2   | + | 0 | 0.99186 | G   | A  | 0.168649 | -0.42881 | 0.088305 | 1.20E-06 | 1478.96 | 0.19246  |
| rs112628469 | 16 | 58186451 | CSNK2A2   | + | 0 | 0.99182 | G   | A  | 0.168658 | -0.42881 | 0.088305 | 1.20E-06 | 1479    | 0.19246  |
| rs55998300  | 16 | 58212393 | CSNK2A2   | + | 0 | 0.99748 | C   | T  | 0.169072 | -0.42609 | 0.087767 | 1.21E-06 | 1479.02 | 0.11511  |
| 16-58238603 | 16 | 58238603 | LOC390739 | + | 0 | 0.90086 | G   | GC | 0.154291 | -0.46298 | 0.095377 | 1.21E-06 | 1478.96 | 0.057008 |
| rs3826095   | 16 | 58217784 | CSNK2A2   | + | 0 | 0.99585 | T   | C  | 0.168727 | -0.42654 | 0.087879 | 1.21E-06 | 1479.04 | 0.13633  |
| rs16959811  | 16 | 58241399 | CSNK2A2   | + | 0 | 0.79049 | G   | A  | 0.155957 | -0.49355 | 0.1018   | 1.25E-06 | 1478.94 | 0.11261  |
| rs58415199  | 16 | 58200617 | CSNK2A2   | + | 0 | 0.99809 | C   | A  | 0.169004 | -0.42534 | 0.087746 | 1.25E-06 | 1479.02 | 0.11432  |
| rs3784914   | 16 | 58209396 | CSNK2A2   | + | 0 | 0.99779 | G   | C  | 0.16913  | -0.42521 | 0.087747 | 1.26E-06 | 1478.97 | 0.11511  |
| rs3736397   | 16 | 58208536 | CSNK2A2   | + | 0 | 0.99788 | C   | T  | 0.169136 | -0.42503 | 0.087742 | 1.27E-06 | 1479    | 0.11511  |
| rs74019825  | 16 | 58206621 | CSNK2A2   | + | 0 | 0.998   | C   | T  | 0.169145 | -0.42478 | 0.087736 | 1.29E-06 | 1479.04 | 0.11511  |
| rs60571175  | 16 | 58206650 | CSNK2A2   | + | 0 | 0.998   | A   | G  | 0.169145 | -0.42478 | 0.087736 | 1.29E-06 | 1479.04 | 0.11511  |
| rs76387456  | 16 | 58204430 | CSNK2A2   | + | 0 | 0.99798 | G   | A  | 0.169146 | -0.42477 | 0.087736 | 1.29E-06 | 1479.04 | 0.11511  |
| rs59638837  | 16 | 58145291 | C16orf80  | + | 0 | 0.91225 | G   | A  | 0.162721 | -0.44977 | 0.093119 | 1.36E-06 | 1478.95 | 0.12497  |
| rs301873    | 5  | 37136998 | C5orf42   | + | 0 | 0.96706 | G   | C  | 0.476176 | -0.33243 | 0.068858 | 1.38E-06 | 1478.95 | 0.5661   |
| rs16959799  | 16 | 58229628 | CSNK2A2   | + | 0 | 0.96423 | A   | G  | 0.161013 | -0.43955 | 0.091106 | 1.40E-06 | 1478.96 | 0.14719  |
| 16-58229403 | 16 | 58229403 |           | + | 0 | 0.95305 | CT  | C  | 0.15804  | -0.44073 | 0.092232 | 1.77E-06 | 1478.92 | 0.11645  |
| 16-58229402 | 16 | 58229402 |           | + | 0 | 0.95305 | T   | TC | 0.15804  | -0.44072 | 0.092232 | 1.77E-06 | 1478.92 | 0.11645  |

|             |    |          |           |   |   |         |    |   |          |          |          |          |         |          |
|-------------|----|----------|-----------|---|---|---------|----|---|----------|----------|----------|----------|---------|----------|
| rs77474474  | 16 | 58205405 | CSNK2A2   | + | 0 | 0.98873 | T  | C | 0.170229 | -0.41891 | 0.087718 | 1.79E-06 | 1479.05 | 0.096088 |
| rs112020835 | 5  | 1.08E+08 | FER       | + | 0 | 0.97339 | A  | G | 0.08054  | 0.60203  | 0.12636  | 1.89E-06 | 1479.04 | 0.48107  |
| rs649653    | 4  | 1.06E+08 | CXXC4     | + | 0 | 0.7691  | G  | A | 0.193831 | -0.45652 | 0.095838 | 1.90E-06 | 1478.93 | 0.50534  |
| rs78869517  | 5  | 1.08E+08 | FER       | + | 0 | 0.97329 | G  | C | 0.080486 | 0.59989  | 0.12646  | 2.10E-06 | 1478.97 | 0.48107  |
| rs244731    | 5  | 1.77E+08 | FGFR4     | + | 1 | 0.99538 | A  | G | 0.236647 | 0.3803   | 0.080327 | 2.20E-06 | 1478.99 | 0.24858  |
| rs78341307  | 5  | 1.08E+08 | FER       | + | 0 | 0.97171 | G  | C | 0.080391 | 0.59778  | 0.12667  | 2.37E-06 | 1478.97 | 0.28767  |
| rs111465548 | 5  | 1.08E+08 | FER       | + | 0 | 0.93718 | G  | C | 0.081231 | 0.60653  | 0.12886  | 2.51E-06 | 1479.01 | 0.29027  |
| rs73220177  | 5  | 1.08E+08 | FER       | + | 0 | 0.95757 | A  | G | 0.082031 | 0.5927   | 0.12595  | 2.53E-06 | 1478.95 | 0.606    |
| rs9322459   | 6  | 1.55E+08 | IPCEF1    | + | 0 | 0.91347 | T  | C | 0.808849 | 0.42174  | 0.089753 | 2.62E-06 | 1478.87 | 0.67423  |
| rs244730    | 5  | 1.77E+08 | NSD1      | + | 0 | 0.96711 | A  | G | 0.233813 | 0.38415  | 0.081913 | 2.74E-06 | 1478.9  | 0.21748  |
| rs3784912   | 16 | 58148246 | C16orf80  | + | 0 | 0.95845 | A  | G | 0.175839 | -0.41371 | 0.088309 | 2.80E-06 | 1478.96 | 0.17695  |
| rs4568379   | 5  | 1.77E+08 | MXD3      | + | 0 | 0.90488 | C  | G | 0.223383 | 0.40564  | 0.086608 | 2.82E-06 | 1478.92 | 0.08475  |
| rs301863    | 5  | 37133558 | C5orf42   | + | 0 | 0.95198 | T  | C | 0.482968 | -0.32652 | 0.069824 | 2.92E-06 | 1478.96 | 0.27409  |
| rs7758731   | 6  | 1.55E+08 | IPCEF1    | + | 0 | 0.79826 | A  | G | 0.759107 | 0.40988  | 0.088043 | 3.23E-06 | 1478.85 | 0.83135  |
| rs4409879   | 12 | 27739993 | PPFIBP1   | + | 1 | 0.72291 | A  | G | 0.178135 | -0.45847 | 0.098494 | 3.24E-06 | 1478.84 | 0.00048  |
| rs8036711   | 15 | 37171699 | LOC145845 | + | 0 | 0.96615 | T  | A | 0.280808 | 0.3512   | 0.075608 | 3.40E-06 | 1478.91 | 0.74761  |
| rs16959786  | 16 | 58228064 | CSNK2A2   | + | 0 | 0.94104 | C  | T | 0.145573 | -0.44453 | 0.095824 | 3.50E-06 | 1479.01 | 0.093219 |
| rs11634677  | 15 | 37171459 | LOC145845 | + | 0 | 0.9536  | G  | A | 0.280491 | 0.35312  | 0.076162 | 3.55E-06 | 1478.89 | 0.79659  |
| rs78004902  | 16 | 58242919 | CSNK2A2   | + | 0 | 0.77115 | T  | C | 0.128366 | -0.51707 | 0.11155  | 3.56E-06 | 1478.93 | 0.08009  |
| rs79409628  | 5  | 1.08E+08 | FER       | + | 0 | 0.95733 | T  | G | 0.081697 | 0.58834  | 0.12704  | 3.63E-06 | 1478.96 | 0.22471  |
| rs10445014  | 16 | 58160974 | C16orf80  | + | 1 | 0.98724 | G  | A | 0.170384 | -0.40701 | 0.087892 | 3.64E-06 | 1479    | 0.11666  |
| rs8036656   | 15 | 37172064 | LOC145845 | + | 1 | 0.97724 | A  | C | 0.279917 | 0.34583  | 0.074762 | 3.73E-06 | 1478.99 | 0.43847  |
| 1-69341239  | 1  | 69341239 |           | + | 0 | 0.7216  | GT | G | 0.122431 | -0.55251 | 0.11956  | 3.81E-06 | 1478.85 | 0.62614  |
| rs12898227  | 15 | 87225439 | AGBL1     | + | 0 | 0.9604  | C  | T | 0.462102 | -0.31471 | 0.068298 | 4.07E-06 | 1478.98 | 0.71413  |
| rs75815475  | 5  | 1.08E+08 | FER       | + | 0 | 0.95189 | A  | C | 0.081511 | 0.58855  | 0.12779  | 4.11E-06 | 1478.99 | 0.22476  |
| rs186663369 | 16 | 58231677 | CSNK2A2   | + | 0 | 0.80678 | A  | G | 0.201188 | -0.42185 | 0.091637 | 4.16E-06 | 1478.86 | 0.22413  |
| rs9783726   | 15 | 87225075 | AGBL1     | + | 0 | 0.96021 | G  | A | 0.462565 | -0.31432 | 0.068284 | 4.16E-06 | 1478.97 | 0.67586  |
| rs74019800  | 16 | 58159888 | C16orf80  | + | 0 | 0.98374 | G  | A | 0.174504 | -0.4023  | 0.087516 | 4.29E-06 | 1479.02 | 0.20437  |
| rs72813185  | 5  | 1.77E+08 | MXD3      | + | 0 | 0.92659 | A  | C | 0.230082 | 0.38617  | 0.084023 | 4.31E-06 | 1478.94 | 0.27006  |
| rs75360637  | 5  | 1.08E+08 | FER       | + | 0 | 0.97309 | C  | T | 0.078741 | 0.58879  | 0.12812  | 4.31E-06 | 1478.98 | 0.36605  |
| rs79621178  | 5  | 1.08E+08 | FER       | + | 0 | 0.96046 | C  | G | 0.082734 | 0.58023  | 0.12626  | 4.32E-06 | 1479    | 0.22524  |
| rs112668446 | 5  | 1.08E+08 | FER       | + | 0 | 0.96015 | A  | G | 0.082791 | 0.58031  | 0.12629  | 4.33E-06 | 1479.04 | 0.22524  |
| rs71592765  | 5  | 1.08E+08 | FER       | + | 0 | 0.96034 | G  | C | 0.082723 | 0.58029  | 0.12629  | 4.33E-06 | 1478.98 | 0.22524  |
| rs79980741  | 5  | 1.08E+08 | FER       | + | 0 | 0.9602  | A  | G | 0.082803 | 0.58025  | 0.12628  | 4.33E-06 | 1478.97 | 0.22609  |
| rs62397242  | 5  | 1.77E+08 | MXD3      | + | 0 | 0.91246 | A  | C | 0.234406 | 0.38668  | 0.084157 | 4.33E-06 | 1478.91 | 0.2764   |
| rs77630811  | 5  | 1.08E+08 | FER       | + | 0 | 0.96051 | G  | A | 0.08283  | 0.58     | 0.12627  | 4.36E-06 | 1478.99 | 0.22609  |
| rs112472930 | 5  | 1.08E+08 | FER       | + | 0 | 0.96082 | G  | A | 0.082849 | 0.57982  | 0.12625  | 4.38E-06 | 1478.96 | 0.22609  |
| rs76325227  | 5  | 1.08E+08 | FER       | + | 0 | 0.96112 | A  | T | 0.082857 | 0.5797   | 0.12623  | 4.38E-06 | 1479.01 | 0.22609  |
| rs113792119 | 5  | 1.08E+08 | FER       | + | 0 | 0.96123 | G  | T | 0.082862 | 0.57961  | 0.12622  | 4.39E-06 | 1479.03 | 0.22609  |
| rs79243757  | 5  | 1.08E+08 | FER       | + | 0 | 0.96115 | G  | A | 0.082974 | 0.57892  | 0.1262   | 4.49E-06 | 1479.02 | 0.22617  |
| rs74019802  | 16 | 58162210 | C16orf80  | + | 0 | 0.99235 | A  | T | 0.170509 | -0.40372 | 0.088009 | 4.49E-06 | 1479.04 | 0.19678  |
| rs77606373  | 5  | 1.08E+08 | FER       | + | 0 | 0.96198 | C  | A | 0.082899 | 0.57882  | 0.12619  | 4.50E-06 | 1479    | 0.22609  |
| rs113193866 | 5  | 1.08E+08 | FER       | + | 0 | 0.96212 | G  | A | 0.0829   | 0.57874  | 0.12618  | 4.50E-06 | 1478.99 | 0.22609  |
| rs112828293 | 5  | 1.08E+08 | FER       | + | 0 | 0.96215 | T  | G | 0.082899 | 0.57871  | 0.12618  | 4.51E-06 | 1478.99 | 0.22609  |
| rs112949822 | 5  | 1.08E+08 | FER       | + | 0 | 0.96114 | A  | G | 0.083078 | 0.57853  | 0.12614  | 4.51E-06 | 1479.04 | 0.22735  |
| rs79001324  | 5  | 1.08E+08 | FER       | + | 0 | 0.9618  | C  | A | 0.082899 | 0.57863  | 0.12621  | 4.55E-06 | 1479.01 | 0.22609  |
| rs113728457 | 5  | 1.08E+08 | FER       | + | 0 | 0.96176 | C  | G | 0.082891 | 0.57829  | 0.12623  | 4.62E-06 | 1479.02 | 0.22609  |
| rs77163552  | 16 | 58137888 | C16orf80  | + | 0 | 0.83099 | C  | T | 0.158045 | -0.4537  | 0.099038 | 4.63E-06 | 1478.94 | 0.17063  |
| rs75955236  | 5  | 1.08E+08 | FER       | + | 0 | 0.95546 | C  | T | 0.085392 | 0.57314  | 0.12517  | 4.67E-06 | 1478.97 | 0.13318  |

|             |    |            |           |   |   |         |     |    |          |          |          |          |         |          |
|-------------|----|------------|-----------|---|---|---------|-----|----|----------|----------|----------|----------|---------|----------|
| rs79536589  | 5  | 1.08E+08   | FER       | + | 0 | 0.96174 | A   | G  | 0.082889 | 0.57794  | 0.12624  | 4.70E-06 | 1479.04 | 0.22609  |
| rs73220190  | 5  | 1.08E+08   | FER       | + | 0 | 0.95548 | C   | T  | 0.081424 | 0.57976  | 0.1268   | 4.82E-06 | 1478.97 | 0.48189  |
| rs301867    | 5  | S 37130856 | C5orf42   | + | 0 | 0.94166 | C   | A  | 0.48715  | -0.32155 | 0.070396 | 4.93E-06 | 1478.95 | 0.17585  |
| rs6930716   | 6  | u 1.55E+08 | IPCEF1    | + | 1 | 0.99632 | C   | T  | 0.831303 | 0.4095   | 0.08967  | 4.95E-06 | 1478.96 | 1        |
| rs11258300  | 10 | p 13316312 | PHYH      | + | 0 | 0.60488 | T   | G  | 0.362672 | 0.41195  | 0.09022  | 4.97E-06 | 1478.94 | 0.69349  |
| rs7171195   | 15 | p 37171230 | LOC145845 | + | 0 | 0.94112 | G   | A  | 0.281686 | 0.34868  | 0.076393 | 5.01E-06 | 1478.9  | 0.69944  |
| rs11738226  | 5  | l 76716430 | PDE8B     | + | 0 | 0.85728 | T   | A  | 0.41797  | 0.34241  | 0.07505  | 5.06E-06 | 1478.98 | 0.10878  |
| rs111636466 | 5  | e 1.08E+08 | FER       | + | 0 | 0.96232 | G   | A  | 0.082954 | 0.57562  | 0.12621  | 5.09E-06 | 1478.97 | 0.22617  |
| rs78492167  | 5  | m 1.08E+08 | FER       | + | 0 | 0.96276 | T   | C  | 0.082944 | 0.57519  | 0.12618  | 5.16E-06 | 1478.94 | 0.22617  |
| rs7912768   | 10 | e 50884092 | C10orf53  | + | 0 | 0.9078  | T   | C  | 0.411416 | 0.33103  | 0.072627 | 5.17E-06 | 1478.93 | 0.25926  |
| rs12859492  | 13 | n 71905552 | DACH1     | + | 0 | 0.88856 | C   | T  | 0.321708 | -0.34039 | 0.074772 | 5.30E-06 | 1478.92 | 0.15278  |
| rs75271047  | 5  | t 1.08E+08 | FER       | + | 0 | 0.96418 | A   | G  | 0.082908 | 0.57403  | 0.12614  | 5.34E-06 | 1478.98 | 0.22617  |
| 5-37168326  | 5  | a 37168326 |           | + | 0 | 0.93967 | A   | AT | 0.492725 | -0.32076 | 0.07052  | 5.40E-06 | 1478.96 | 0.16002  |
| rs73549151  | 16 | r 58144187 | C16orf80  | + | 0 | 0.89886 | G   | A  | 0.183056 | -0.40555 | 0.089191 | 5.44E-06 | 1478.91 | 0.045736 |
| 5-108074449 | 5  | y 1.08E+08 |           | + | 0 | 0.96495 | AT  | A  | 0.08289  | 0.57335  | 0.12611  | 5.45E-06 | 1478.95 | 0.22617  |
| 10-50884075 | 10 | T 50884075 |           | + | 0 | 0.90316 | TCA | T  | 0.412479 | 0.33117  | 0.072845 | 5.46E-06 | 1478.91 | 0.23781  |
| rs77844865  | 5  | a 1.08E+08 | FER       | + | 0 | 0.96507 | C   | T  | 0.08289  | 0.57322  | 0.1261   | 5.48E-06 | 1478.94 | 0.22617  |
| rs13379594  | 15 | b 37172558 | LOC145845 | + | 0 | 0.95901 | C   | G  | 0.276727 | 0.34652  | 0.076234 | 5.48E-06 | 1478.95 | 0.7948   |
| rs7180198   | 15 | i 87228075 | AGBL1     | + | 0 | 0.95595 | C   | T  | 0.459705 | -0.31031 | 0.068455 | 5.81E-06 | 1478.98 | 0.71384  |
| rs113427433 | 5  | e 1.08E+08 | FER       | + | 0 | 0.93498 | A   | G  | 0.081275 | 0.5816   | 0.12853  | 6.04E-06 | 1478.98 | 0.48293  |
| rs10004325  | 4  | s 1.77E+08 | SPATA4    | + | 0 | 0.93974 | C   | G  | 0.161804 | 0.42285  | 0.093572 | 6.21E-06 | 1479    | 0.77313  |
| rs8043203   | 15 | 5 87224199 | AGBL1     | + | 0 | 0.95141 | C   | A  | 0.462896 | -0.30998 | 0.068631 | 6.28E-06 | 1478.96 | 0.71446  |
| rs1553738   | 15 | : 56370951 | RFXDC2    | + | 0 | 0.83657 | G   | T  | 0.066757 | 0.66522  | 0.14771  | 6.68E-06 | 1478.97 | 0.67567  |
| rs10073054  | 5  | 37172383   | C5orf42   | + | 0 | 0.92009 | G   | A  | 0.503073 | -0.31978 | 0.071054 | 6.78E-06 | 1478.95 | 0.23156  |
| rs11630710  | 15 | l 56364758 | RFXDC2    | + | 0 | 0.78882 | T   | G  | 0.066079 | 0.69058  | 0.15351  | 6.84E-06 | 1478.98 | 0.39985  |
| rs1553737   | 15 | m 56370492 | RFXDC2    | + | 0 | 0.83387 | T   | C  | 0.066364 | 0.66664  | 0.1483   | 6.95E-06 | 1479.02 | 0.67574  |
| rs28457856  | 4  | p 1.77E+08 | SPATA4    | + | 0 | 0.95753 | A   | G  | 0.291493 | 0.33736  | 0.075142 | 7.13E-06 | 1478.97 | 0.80126  |
| rs76712141  | 15 | a 56501134 | RFX7      | + | 0 | 0.8198  | C   | T  | 0.054823 | 0.73961  | 0.16489  | 7.28E-06 | 1479.03 | 0.31414  |
| rs75421844  | 5  | c 1.08E+08 | FER       | + | 0 | 0.94137 | C   | T  | 0.082352 | 0.57264  | 0.12772  | 7.34E-06 | 1479.01 | 0.22469  |
| rs72736501  | 15 | 56423061   | RFX7      | + | 0 | 0.89742 | A   | C  | 0.064856 | 0.64796  | 0.14465  | 7.48E-06 | 1479.04 | 0.82891  |
| rs116140504 | 15 | 56410918   | RFX7      | + | 0 | 0.89603 | G   | A  | 0.065215 | 0.64662  | 0.1444   | 7.54E-06 | 1478.93 | 0.82931  |
| rs72736484  | 15 | 56408168   | RFX7      | + | 0 | 0.89594 | G   | T  | 0.065221 | 0.64661  | 0.1444   | 7.54E-06 | 1478.95 | 0.82931  |
| rs113877323 | 5  | 1.08E+08   | FER       | + | 0 | 0.96976 | C   | A  | 0.08036  | 0.56961  | 0.12735  | 7.72E-06 | 1478.98 | 0.28816  |
| rs2065415   | 6  | 1.69E+08   | THBS2     | + | 0 | 0.74107 | G   | A  | 0.811543 | 0.44432  | 0.099401 | 7.82E-06 | 1478.89 | 0.93209  |
| rs75475720  | 5  | 1.08E+08   | FER       | + | 0 | 0.9403  | G   | C  | 0.082275 | 0.56993  | 0.12784  | 8.27E-06 | 1478.98 | 0.22468  |
| rs9746214   | 16 | 58179472   | CSNK2A2   | + | 0 | 0.74539 | C   | T  | 0.089175 | -0.60439 | 0.13583  | 8.60E-06 | 1478.98 | 0.87192  |
| rs571880    | 4  | 1.06E+08   | CXXC4     | + | 0 | 0.95135 | A   | T  | 0.230691 | -0.35927 | 0.080852 | 8.85E-06 | 1478.94 | 0.50858  |
| rs4392004   | 15 | 56548922   | RFXDC2    | + | 0 | 0.88918 | G   | A  | 0.063626 | 0.65005  | 0.14643  | 9.02E-06 | 1478.98 | 0.82856  |
| rs7175969   | 15 | 56371998   | RFXDC2    | + | 0 | 0.85348 | T   | C  | 0.93362  | -0.65064 | 0.1466   | 9.07E-06 | 1479    | 0.67574  |
| rs60621000  | 16 | 17329849   | XYLT1     | + | 0 | 0.56347 | A   | G  | 0.145279 | 0.56413  | 0.12711  | 9.07E-06 | 1478.9  | 0.91647  |
| rs139758543 | 8  | 97063079   | GAPDHP30  | + | 0 | 0.57191 | A   | G  | 0.075335 | 0.74863  | 0.16888  | 9.29E-06 | 1478.98 | 0.85051  |
| rs181139921 | 15 | 56426852   | RFX7      | + | 0 | 0.8799  | T   | A  | 0.061559 | 0.66211  | 0.14948  | 9.45E-06 | 1479.03 | 0.65124  |
| rs488076    | 4  | 1.06E+08   | CXXC4     | + | 0 | 0.94039 | A   | C  | 0.229521 | -0.36074 | 0.081482 | 9.55E-06 | 1478.95 | 0.50786  |
| rs78579945  | 5  | 1.08E+08   | FER       | + | 0 | 0.99088 | G   | T  | 0.079362 | 0.55982  | 0.12658  | 9.75E-06 | 1479.03 | 0.28804  |
| rs76112574  | 5  | 1.08E+08   | FER       | + | 0 | 0.99063 | T   | C  | 0.079393 | 0.55915  | 0.12658  | 9.99E-06 | 1479.02 | 0.28804  |

Supplementary Table 5. Effect of Relative Telomere Length on Quantitative Traits

|                                     | BETA(SE)   | P (Not adjusted) | BETA(SE)   | P            | MODEL                     |
|-------------------------------------|------------|------------------|------------|--------------|---------------------------|
| <b>Cardio Vascular traits</b>       |            |                  |            |              |                           |
| <b>SYBP(mmHg)</b>                   | -1.20(.17) | <b>4E-03</b>     | -1.03(.07) | <b>2E-03</b> | SEX,AGE,BMI,T2D           |
| <b>DYSBP(mmHg)</b>                  | -0.55(.21) | 7.6E-02          | -0.68(.15) | <b>2E-03</b> | SEX,AGE,BMI,T2D           |
| <b>Mean Arterial pressure(mmHg)</b> | -0.76(.26) | <b>2.4E-02</b>   | -0.83(.13) | 5.8E-02      | SEX,AGE,BMI,T2D           |
| <b>MCP-1(pg/ml)</b>                 | -0.17(.04) | <b>7E-06</b>     | -0.05(.14) | <b>7E-07</b> | SEX,AGE,BMI,T2D           |
| <b>Metabolic traits</b>             |            |                  |            |              |                           |
| <b>FBG(mg/dl)</b>                   | -0.12(.06) | 4.3E-01          | -0.24(.13) | 2.7E-01      | SEX,AGE,BMI,CONTROLS ONLY |
| <b>HOMA-B</b>                       | 0.11(.05)  | <b>3E-04</b>     | 0.16(.09)  | <b>1E-04</b> | SEX,AGE,BMI,T2D           |

SE- Standard Error, SYBP- systolic blood pressure, DYSBP-diastolic blood pressure, FBG-fasting blood glucose, HOMA-β - Homeostatic Model Assessment- beta, MCP-1- Monocyte chemoattractant protein 1

**Supplementary Table 6. Association of Previously Established Risk Variants for Relative Telomere Length in Sikh Discovery GWAS**

| <b>SNP</b> | <b>Gene</b>   | <b>Chr</b> | <b>Position</b> | <b>Genotyped/imputed</b> | <b>effect allele</b> | <b>base allele</b> | <b>freq</b> | <b>effect</b> | <b>BETA</b> | <b>SE</b> | <b>P</b> | <b>N</b> | <b>HWE</b> | <b>CONSISTENT</b> |
|------------|---------------|------------|-----------------|--------------------------|----------------------|--------------------|-------------|---------------|-------------|-----------|----------|----------|------------|-------------------|
| rs10936599 | <i>TERC</i>   | 3          | 169492101       | g                        | T                    | C                  | 0.30        | 0.19          | 0.07        | 9.74E-03  | 1478.99  | 0.90     | NO         |                   |
| rs8105767  | <i>ZNF208</i> | 19         | 22215441        | i                        | G                    | A                  | 0.40        | -0.04         | 0.07        | 0.54      | 1479.00  | 0.45     | NO         |                   |
| rs7675998  | <i>NAF1</i>   | 4          | 164007820       | i                        | G                    | A                  | 0.82        | -0.04         | 0.09        | 0.67      | 1478.99  | 0.07     | NO         |                   |
| rs9420907  | <i>OBCF1</i>  | 10         | 105676465       | g                        | A                    | C                  | 0.91        | -0.04         | 0.11        | 0.70      | 1479.03  | 0.36     | YES        |                   |
| rs2736100  | <i>TERT</i>   | 5          | 1286516         | g                        | A                    | C                  | 0.38        | -0.02         | 0.07        | 0.78      | 1478.98  | 1.00     | YES        |                   |
| rs11125529 | <i>ACYP2</i>  | 2          | 54475866        | i                        | A                    | C                  | 0.11        | 0.00          | 0.11        | 0.98      | 1479.02  | 0.60     | YES        |                   |

All imputed SNPs on the list were imputed with info >0.95

Supplementary Table 7: Punjabi Sikh Discovery and Stage 1 Replication Meta-analysis Results

| SNP         | CHR | BP        | GENE         | Allele1 | Allele2 | Effect  | SE     | P-value  | Direction | HetChiSq | HetDf | HetPVal   |
|-------------|-----|-----------|--------------|---------|---------|---------|--------|----------|-----------|----------|-------|-----------|
| rs74019828  | 16  | 58209274  | CSNK2A2      | a       | g       | -0.3818 | 0.0698 | 4.52E-08 | --        | 0.79     | 1     | 0.3741    |
| rs2098713   | 5   | 37144574  | C5orf42/TERT | t       | c       | -0.249  | 0.0536 | 3.35E-06 | --        | 4.46     | 1     | 0.0347    |
| rs10004325  | 4   | 177106289 | SPATA4       | c       | g       | 0.3153  | 0.0738 | 1.95E-05 | ++        | 3.502    | 1     | 0.0613    |
| rs78869517  | 5   | 108050074 | FER          | c       | g       | -0.4151 | 0.099  | 2.78E-05 | --        | 5.525    | 1     | 0.01874   |
| rs4409879   | 12  | 27739993  | PPFIBP1      | a       | g       | -0.3168 | 0.0764 | 3.36E-05 | --        | 5.188    | 1     | 0.02274   |
| rs244731    | 5   | 176539679 | NA           | a       | g       | 0.2577  | 0.0634 | 4.82E-05 | ++        | 6.18     | 1     | 0.01292   |
| rs9988609   | 1   | 69087816  | NA           | a       | g       | -0.3577 | 0.0889 | 5.78E-05 | --        | 2.666    | 1     | 0.1025    |
| rs112020835 | 5   | 103218341 | FER          | a       | g       | 0.3812  | 0.098  | 1E-04    | ++        | 7.66     | 1     | 0.005646  |
| rs8036656   | 15  | 37172064  | LOC145845    | a       | c       | 0.2101  | 0.0593 | 3.9E-04  | +-        | 8.872    | 1     | 0.002896  |
| rs11738226  | 5   | 76716430  | PDE8B        | a       | t       | -0.1788 | 0.057  | 1.6E-03  | -+        | 11.206   | 1     | 0.0008152 |
| rs12859492  | 13  | 71905552  | NA           | t       | c       | 0.1355  | 0.0593 | 2.2E-02  | +-        | 20.241   | 1     | 6.83E-06  |



Supplementary Table 8A: Punjabi Sikh Initial Discovery analysis adjusting for age, gender and BMI

| SNP         | CHR | BP       | EFFECT_ALLELE | BASE_ALLELE | FREQ_EFFECT | BETA     | SE       | P        |
|-------------|-----|----------|---------------|-------------|-------------|----------|----------|----------|
| 16-58234260 | 16  | 58234260 | GA            | G           | 0.1801      | -0.46367 | 0.089178 | 2.00E-07 |
| rs11076223  | 16  | 58239558 | G             | T           | 0.1744      | -0.47677 | 0.092634 | 2.65E-07 |
| rs1834021   | 16  | 58234767 | C             | T           | 0.1764      | -0.45968 | 0.089493 | 2.80E-07 |
| rs8058372   | 16  | 58238081 | A             | C           | 0.1761      | -0.46832 | 0.091179 | 2.80E-07 |
| rs7196068   | 16  | 58234135 | A             | G           | 0.1768      | -0.45796 | 0.089224 | 2.86E-07 |
| rs58553914  | 16  | 58233709 | C             | T           | 0.1766      | -0.45819 | 0.089509 | 3.07E-07 |
| rs73549172  | 16  | 58181055 | A             | G           | 0.1863      | -0.43647 | 0.085464 | 3.27E-07 |
| 16-58139084 | 16  | 58139084 | A             | AC          | 0.1579      | -0.49511 | 0.097088 | 3.40E-07 |
| rs11860708  | 16  | 58178596 | A             | G           | 0.1868      | -0.43308 | 0.085179 | 3.69E-07 |
| 16-58240273 | 16  | 58240273 | C             | CTTTAT      | 0.1653      | -0.48285 | 0.095176 | 3.91E-07 |
| 16-58179843 | 16  | 58179843 | C             | CA          | 0.1859      | -0.43335 | 0.085444 | 3.94E-07 |
| rs58588258  | 16  | 58189271 | A             | C           | 0.1825      | -0.43487 | 0.08598  | 4.24E-07 |
| rs7185651   | 16  | 58187826 | G             | A           | 0.1825      | -0.43465 | 0.085982 | 4.30E-07 |
| rs59165986  | 16  | 58186952 | T             | C           | 0.1826      | -0.43449 | 0.085982 | 4.34E-07 |
| rs8044707   | 16  | 58240972 | T             | C           | 0.16        | -0.49479 | 0.098123 | 4.59E-07 |
| rs111234535 | 16  | 58137426 | A             | G           | 0.1431      | -0.5211  | 0.10335  | 4.60E-07 |
| rs2098713   | 5   | 37144574 | T             | C           | 0.4707      | -0.33293 | 0.066886 | 6.44E-07 |
| rs77762167  | 16  | 58141185 | G             | T           | 0.1611      | -0.47182 | 0.094903 | 6.64E-07 |
| rs74019786  | 16  | 58141441 | G             | A           | 0.1613      | -0.47055 | 0.094742 | 6.81E-07 |
| rs74019791  | 16  | 58141882 | G             | A           | 0.1616      | -0.46829 | 0.094471 | 7.16E-07 |
| rs74019790  | 16  | 58141827 | C             | T           | 0.1617      | -0.46835 | 0.094489 | 7.17E-07 |
| rs74019792  | 16  | 58141933 | A             | G           | 0.1616      | -0.46806 | 0.094441 | 7.19E-07 |
| rs78955299  | 16  | 58141203 | T             | C           | 0.1613      | -0.47127 | 0.095145 | 7.30E-07 |
| rs55990878  | 16  | 58142126 | C             | T           | 0.1617      | -0.46717 | 0.094322 | 7.31E-07 |
| rs76411253  | 5   | 1.08E+08 | A             | G           | 0.07848     | 0.6948   | 0.14043  | 7.51E-07 |
| rs60765503  | 16  | 58144761 | G             | A           | 0.1621      | -0.46073 | 0.093172 | 7.62E-07 |
| rs113577652 | 16  | 58232261 | A             | C           | 0.1658      | -0.44953 | 0.091099 | 8.03E-07 |
| rs74019794  | 16  | 58144179 | C             | G           | 0.162       | -0.46051 | 0.09335  | 8.09E-07 |
| rs61535084  | 16  | 58143889 | G             | T           | 0.1622      | -0.46059 | 0.093418 | 8.21E-07 |
| rs10445026  | 16  | 58143253 | G             | A           | 0.1624      | -0.46155 | 0.09362  | 8.22E-07 |
| rs74019793  | 16  | 58144117 | G             | A           | 0.1638      | -0.45898 | 0.093474 | 9.10E-07 |
| rs57827735  | 16  | 58144938 | C             | T           | 0.1624      | -0.45484 | 0.092709 | 9.29E-07 |
| rs301869    | 5   | 37140597 | A             | T           | 0.4747      | -0.33429 | 0.068191 | 9.47E-07 |
| rs149021498 | 16  | 58231487 | A             | G           | 0.1655      | -0.43891 | 0.089751 | 1.01E-06 |
| rs74019837  | 16  | 58231266 | T             | C           | 0.1657      | -0.43837 | 0.08965  | 1.01E-06 |
| rs77325010  | 16  | 58230324 | G             | A           | 0.1662      | -0.43559 | 0.089194 | 1.04E-06 |
| rs301872    | 5   | 37137858 | G             | C           | 0.4757      | -0.33434 | 0.068462 | 1.04E-06 |
| rs75241789  | 16  | 58224666 | A             | G           | 0.1714      | -0.42847 | 0.087854 | 1.08E-06 |
| rs57474112  | 16  | 58228856 | G             | A           | 0.1671      | -0.43127 | 0.088496 | 1.10E-06 |

Supplementary Table 8B: Punjabi Sikh initial discovery analysis for BMI &lt; 25

| SNP         | CHR | BP       | EFFECT_ALLELE | BASE_ALLELE | FREQ_EFFECT | BETA     | SE      | P        |
|-------------|-----|----------|---------------|-------------|-------------|----------|---------|----------|
| rs301872    | 5   | 37137858 | G             | C           | 0.4925      | -0.57874 | 0.10642 | 5.38E-08 |
| rs301869    | 5   | 37140597 | A             | T           | 0.4913      | -0.57579 | 0.10595 | 5.49E-08 |
| rs301873    | 5   | 37136998 | G             | C           | 0.4935      | -0.58156 | 0.10723 | 5.85E-08 |
| rs111851553 | 8   | 15216403 | A             | G           | 0.06561     | 1.2644   | 0.23387 | 6.43E-08 |
| rs301863    | 5   | 37133558 | T             | C           | 0.5018      | -0.58367 | 0.1088  | 8.12E-08 |
| rs2098713   | 5   | 37144574 | T             | C           | 0.4874      | -0.55408 | 0.10342 | 8.44E-08 |
| rs301867    | 5   | 37130856 | C             | A           | 0.5059      | -0.5824  | 0.10928 | 9.84E-08 |
| 5-37094419  | 5   | 37094419 | TTAAC         | T           | 0.4746      | -0.6099  | 0.11744 | 2.06E-07 |
| rs9693907   | 8   | 15154598 | T             | G           | 0.1453      | 0.85291  | 0.16523 | 2.44E-07 |
| rs301906    | 5   | 37105606 | T             | C           | 0.5         | -0.58575 | 0.11366 | 2.56E-07 |
| 5-37168326  | 5   | 37168326 | A             | AT          | 0.5126      | -0.5644  | 0.11028 | 3.09E-07 |
| rs301908    | 5   | 37103806 | T             | A           | 0.5001      | -0.58186 | 0.1139  | 3.24E-07 |
| rs301909    | 5   | 37102627 | T             | C           | 0.4995      | -0.58076 | 0.11399 | 3.49E-07 |
| rs301878    | 5   | 37097138 | T             | C           | 0.4983      | -0.57968 | 0.11473 | 4.36E-07 |
| rs10073054  | 5   | 37172383 | G             | A           | 0.5279      | -0.56205 | 0.11142 | 4.55E-07 |
| rs301874    | 5   | 37094291 | G             | A           | 0.4904      | -0.58519 | 0.11629 | 4.85E-07 |
| rs7017139   | 8   | 15205895 | C             | T           | 0.1039      | 0.94929  | 0.19099 | 6.68E-07 |
| 5-37176864  | 5   | 37176864 | CT            | C           | 0.5258      | -0.61297 | 0.12451 | 8.51E-07 |
| rs11727182  | 4   | 1.51E+08 | A             | G           | 0.3973      | -0.5453  | 0.11097 | 8.93E-07 |
| rs6887958   | 5   | 37189819 | G             | A           | 0.52        | -0.54727 | 0.11233 | 1.11E-06 |
| rs6451313   | 5   | 37182310 | T             | C           | 0.521       | -0.54546 | 0.11227 | 1.18E-06 |
| rs6860727   | 5   | 37179341 | A             | G           | 0.5204      | -0.54472 | 0.11213 | 1.19E-06 |
| 5-169525862 | 5   | 1.7E+08  | G             | GT          | 0.05028     | 2.2235   | 0.32697 | 1.24E-06 |
| rs6993454   | 8   | 15205901 | T             | C           | 0.1043      | 0.9117   | 0.18904 | 1.42E-06 |
| rs56092751  | 8   | 15205204 | T             | G           | 0.1412      | 0.75212  | 0.15665 | 1.58E-06 |
| rs7715883   | 5   | 37238262 | C             | T           | 0.5049      | -0.54045 | 0.11261 | 1.59E-06 |
| rs7729404   | 5   | 37238050 | G             | A           | 0.505       | -0.54021 | 0.11263 | 1.62E-06 |
| rs301905    | 5   | 37111383 | C             | T           | 0.4733      | -0.54645 | 0.11431 | 1.75E-06 |
| rs4498539   | 8   | 15185883 | T             | A           | 0.1468      | 0.71428  | 0.15013 | 1.96E-06 |
| rs61652782  | 8   | 15200617 | A             | G           | 0.141       | 0.73356  | 0.1546  | 2.08E-06 |
| rs6987496   | 8   | 15204533 | T             | C           | 0.1425      | 0.72531  | 0.15313 | 2.18E-06 |
| rs62499923  | 8   | 15204065 | T             | G           | 0.1425      | 0.72358  | 0.15285 | 2.20E-06 |
| rs6982651   | 8   | 15203869 | T             | C           | 0.1427      | 0.72226  | 0.15265 | 2.23E-06 |
| rs11991432  | 8   | 15203469 | C             | G           | 0.1426      | 0.72033  | 0.15241 | 2.29E-06 |
| rs1930219   | 13  | 96908722 | A             | G           | 0.5135      | -0.48259 | 0.10216 | 2.32E-06 |
| rs7006627   | 8   | 15204240 | G             | A           | 0.1433      | 0.72173  | 0.15286 | 2.34E-06 |
| rs6886108   | 5   | 37252939 | C             | T           | 0.5059      | -0.58179 | 0.12323 | 2.34E-06 |
| rs28621423  | 8   | 15169185 | G             | T           | 0.147       | 0.70616  | 0.14971 | 2.40E-06 |
| rs12114950  | 8   | 15169007 | G             | A           | 0.1472      | 0.70394  | 0.14925 | 2.40E-06 |

Supplementary Table 8C: Punjabi Sikh Initial Discovery analysis for BMI > 25

| SNP         | CHR | BP       | EFFECT_ALLELE | BASE_ALLELE | FREQ_EFFECT | BETA     | SE       | P        |
|-------------|-----|----------|---------------|-------------|-------------|----------|----------|----------|
| rs11634677  | 15  | 37171459 | G             | A           | 0.2726      | 0.46329  | 0.098036 | 2.29E-06 |
| rs8036711   | 15  | 37171699 | T             | A           | 0.273       | 0.45814  | 0.097172 | 2.42E-06 |
| rs114508985 | 6   | 32900018 | G             | C           | 0.7518      | 0.57875  | 0.12338  | 2.72E-06 |
| rs8036656   | 15  | 37172064 | A             | C           | 0.2718      | 0.45069  | 0.096116 | 2.74E-06 |
| rs7171195   | 15  | 37171230 | G             | A           | 0.274       | 0.46042  | 0.098309 | 2.82E-06 |
| 5-97298072  | 5   | 97298072 | TA            | T           | 0.3239      | -0.50307 | 0.108    | 3.19E-06 |
| rs12909623  | 15  | 37173147 | G             | T           | 0.4751      | 0.4243   | 0.092098 | 4.08E-06 |
| 15-95721821 | 15  | 95721821 | A             | AT          | 0.2049      | -0.61981 | 0.1346   | 4.13E-06 |
| rs60077625  | 1   | 1.72E+08 | A             | G           | 0.2701      | 0.48251  | 0.10479  | 4.14E-06 |
| rs2070886   | 12  | 6094065  | T             | C           | 0.1764      | -0.52036 | 0.11332  | 4.39E-06 |
| rs13379594  | 15  | 37172558 | C             | G           | 0.2685      | 0.44894  | 0.09793  | 4.56E-06 |
| rs2568838   | 3   | 71309259 | C             | G           | 0.4286      | 0.42808  | 0.093915 | 5.16E-06 |
| rs2256864   | 7   | 1.51E+08 | A             | G           | 0.3563      | -0.46031 | 0.1012   | 5.40E-06 |
| rs11070169  | 15  | 39320011 | T             | C           | 0.3289      | 0.4142   | 0.091081 | 5.43E-06 |
| rs12904358  | 15  | 37172926 | T             | C           | 0.4695      | 0.41551  | 0.091431 | 5.51E-06 |
| rs12904352  | 15  | 37172918 | G             | C           | 0.2719      | 0.44165  | 0.098353 | 7.11E-06 |
| rs4725398   | 7   | 1.51E+08 | G             | A           | 0.3493      | -0.45581 | 0.1017   | 7.40E-06 |
| 15-37173119 | 15  | 37173119 | AT            | A           | 0.4701      | 0.40918  | 0.091315 | 7.43E-06 |
| 5-97298080  | 5   | 97298080 | TC            | T           | 0.3383      | -0.46789 | 0.10498  | 8.31E-06 |
| 15-79220928 | 15  | 79220928 | A             | AAAAG       | 0.09559     | -0.72596 | 0.16361  | 9.12E-06 |
| rs12903788  | 15  | 37173267 | A             | G           | 0.4713      | 0.40439  | 0.09132  | 9.50E-06 |
| rs2118381   | 2   | 19368078 | A             | G           | 0.6755      | 0.40296  | 0.091435 | 1.05E-05 |
| rs12495693  | 3   | 71337856 | C             | T           | 0.2487      | -0.44098 | 0.10035  | 1.11E-05 |
| rs6103674   | 20  | 42826710 | T             | C           | 0.1588      | -0.51625 | 0.11757  | 1.13E-05 |
| 7-17119073  | 7   | 17119073 | TA            | T           | 0.8615      | -0.62744 | 0.1429   | 1.13E-05 |
| rs78040573  | 15  | 95725639 | A             | G           | 0.2264      | -0.53367 | 0.1216   | 1.14E-05 |
| rs1870238   | 7   | 1.51E+08 | G             | C           | 0.3489      | -0.43365 | 0.099317 | 1.26E-05 |
| rs3097978   | 11  | 1.26E+08 | A             | G           | 0.2529      | -0.47533 | 0.10902  | 1.30E-05 |
| rs10893595  | 11  | 99483734 | C             | T           | 0.1874      | 0.49155  | 0.11278  | 1.31E-05 |
| rs4666323   | 2   | 19328111 | A             | G           | 0.6819      | 0.39706  | 0.09114  | 1.32E-05 |
| 11-74422845 | 11  | 74422845 | AT            | A           | 0.09201     | 0.84733  | 0.19464  | 1.34E-05 |
| rs536344    | 11  | 1.26E+08 | A             | G           | 0.2701      | -0.45576 | 0.10474  | 1.35E-05 |
| rs6031450   | 20  | 42830192 | T             | A           | 0.7537      | -0.42937 | 0.098689 | 1.36E-05 |
| rs11853413  | 15  | 39319573 | G             | A           | 0.3251      | 0.3884   | 0.089467 | 1.42E-05 |
| rs10851378  | 15  | 39322422 | G             | A           | 0.327       | 0.42649  | 0.098366 | 1.45E-05 |
| rs62001260  | 15  | 33064635 | T             | C           | 0.4425      | 0.40526  | 0.09378  | 1.55E-05 |
| rs61137448  | 15  | 95729571 | C             | T           | 0.2295      | -0.53155 | 0.12301  | 1.55E-05 |
| rs78045666  | 15  | 95725068 | T             | C           | 0.2219      | -0.54463 | 0.1261   | 1.57E-05 |
| rs144790127 | 15  | 95727316 | A             | G           | 0.2284      | -0.53026 | 0.12294  | 1.61E-05 |

Supplementary Table 9A: Punjabi Sikh Discovery and Stage 1(Replication) meta-analysis with age, gender and BMI as covariates

| CHR | BP       | SNP        | A1 | A2 | P        | OR     | Q      | I <sup>2</sup> |
|-----|----------|------------|----|----|----------|--------|--------|----------------|
| 5   | 37144574 | rs2098713  | T  | C  | 1.63E-08 | 0.7479 | 0.1584 | 49.72          |
| 16  | 58209274 | rs74019828 | A  | G  | 5.51E-07 | 0.6973 | 0.1935 | 40.87          |

Supplementary Table 9B: Punjabi Sikh Discovery and Stage 1(Replication) meta-analysis for BMI < 25

| CHR | BP       | SNP       | A1 | A2 | P        | OR     | Q      | I <sup>2</sup> |
|-----|----------|-----------|----|----|----------|--------|--------|----------------|
| 5   | 37144574 | rs2098713 | T  | C  | 2.22E-05 | 0.6206 | 0.4523 | 0              |

Supplementary Table 9C: Punjabi Sikh Discovery and Stage 1(Replication) meta-analysis for BMI > 25

| CHR | BP       | SNP        | A1 | A2 | P        | OR     | Q      | I <sup>2</sup> |
|-----|----------|------------|----|----|----------|--------|--------|----------------|
| 16  | 58209274 | rs74019828 | A  | G  | 2.15E-04 | 0.5787 | 0.2207 | 33.32          |

Supplementary Table 10: Punjabi Sikh Discovery and Stage 1 (Replication) meta-analysis with different models

| SNP        | POSITION       | GENE                      | ALLELES | MODEL     | P                        | β,SE       |
|------------|----------------|---------------------------|---------|-----------|--------------------------|------------|
| rs74019828 | 16<br>58209274 | CSNK2A2                   | A/G     | ADDITIVE  | 4.52 × 10 <sup>-08</sup> | -0.38,0.06 |
|            |                |                           |         | DOMINANT  | 1.16 × 10 <sup>-05</sup> | -0.34,0.10 |
|            |                |                           |         | RECESSIVE | 3.80 × 10 <sup>-04</sup> | -0.73,0.12 |
| rs2098713  | 5<br>37144574  | C5orf42<br>(Near<br>TERT) | T/C     | ADDITIVE  | 3.35 × 10 <sup>-06</sup> | -0.25,0.05 |
|            |                |                           |         | DOMINANT  | 6.36 × 10 <sup>-06</sup> | -0.33,0.08 |
|            |                |                           |         | RECESSIVE | 4.28 × 10 <sup>-04</sup> | -0.30,0.15 |
| rs78869517 | 5<br>108050074 | FER                       | C/G     | ADDITIVE  | 2.78 × 10 <sup>-05</sup> | 0.41,0.09  |
|            |                |                           |         | DOMINANT  | 8.52 × 10 <sup>-07</sup> | 0.63,0.17  |
|            |                |                           |         | RECESSIVE | 6.85 × 10 <sup>-01</sup> | 0.16,0.11  |

Supplementary Table 11: AIDHS/SDS and UKCVD Meta-analysis Results

| SNP         | CHR | BP        | GENE    | Allele1 | Allele2 | Effect  | StdErr | P-value | Direction | HetChiSq | HetDf | HetPVal  |
|-------------|-----|-----------|---------|---------|---------|---------|--------|---------|-----------|----------|-------|----------|
| rs74019828  | 16  | 58209274  | CSNK2A2 | a       | g       | -0.0588 | 0.0164 | 3.2E-04 | ---       | 23.446   | 2     | 8.11E-06 |
| rs112020835 | 5   | 103218341 | FER     | a       | g       | 0.0267  | 0.0151 | 7.8E-02 | +++       | 21.073   | 2     | 2.66E-05 |

Supplementary Table 12A: Multi-Ethnic Meta-analysis Results

| SNP         | CHR | BP        | GENE      | Allele1 | Allele2 | Effect  | StdErr | P-value | Direction | HetChiSq | HetDf | HetPVal   |
|-------------|-----|-----------|-----------|---------|---------|---------|--------|---------|-----------|----------|-------|-----------|
| rs74019828  | 16  | 58209274  | CSNK2A2   | a       | g       | -0.0317 | 0.0103 | 2.1E-03 | ---+++-   | 30.053   | 8     | 0.0002069 |
| rs117119920 | 20  | 22325663  | LOC284788 | t       | g       | 0.0692  | 0.0226 | 2.2E-03 | +++???    | 11.286   | 4     | 0.02353   |
| rs12935153  | 16  | 79667015  | MAF       | a       | g       | 0.0193  | 0.0076 | 1E-02   | +++++0    | 16.202   | 6     | 0.01271   |
| rs11154619  | 6   | 131428095 | AKAP7     | a       | g       | 0.0299  | 0.0122 | 1.4E-02 | +++???    | 21.662   | 4     | 0.000234  |
| rs4502258   | 17  | 65445711  | PITPNC1   | t       | c       | 0.0242  | 0.0101 | 1.6E-02 | +++???    | 16.671   | 4     | 0.002239  |
| rs10065850  | 5   | 32067398  | PDZD2     | a       | g       | -0.0212 | 0.0095 | 2.5E-02 | ++-+--    | 26.511   | 6     | 0.0001788 |
| rs11199695  | 10  | 122754470 | BRWD2     | t       | g       | 0.0156  | 0.0074 | 3.4E-02 | ++-++++   | 18.952   | 6     | 0.004245  |
| rs12516673  | 5   | 149105605 | PPARGC1B  | a       | t       | -0.018  | 0.0089 | 4.4E-02 | -??-----  | 16.974   | 6     | 0.009379  |
| rs12043296  | 1   | 220569966 | LOC127086 | a       | c       | -0.0147 | 0.0073 | 4.4E-02 | -??-+--   | 15.85    | 6     | 0.01458   |
| rs649653    | 4   | 105518376 | CXXC4     | a       | g       | 0.0234  | 0.0117 | 4.5E-02 | +++???    | 28.917   | 4     | 8.13E-06  |
| rs146122959 | 1   | 106217141 | VAV3      | t       | c       | -0.0342 | 0.0172 | 4.7E-02 | -??-??-   | 13.768   | 4     | 0.008073  |

Supplementary Table 12B: GWAS, replication, and meta-analysis results of RTL loci identified in Punjabi Sikhs

| SNP        | Chromosome<br>Position | Nearest<br>gene           | Effect/<br>Other<br>Allele | EAF          | Punjabi Sikh<br>Discovery<br>GWAS    | Punjabi<br>Sikh<br>Replication<br>(Stage 1) | EAF       | UK CVDS<br>(Stage 2)                  | EAF         | UK TWINS<br>(Stage 3)                     | EAF  | NHS<br>(Stage 3)                      | EAF  | PLCO<br>(Stage 3)                      | EAF   | MDACC<br>(Stage 3)                   | EAF | Sikh<br>Meta-<br>analysis            | Sikh-<br>UK CVDS<br>Meta-<br>analysis | Multi-<br>ethnic<br>Meta-<br>analysis |
|------------|------------------------|---------------------------|----------------------------|--------------|--------------------------------------|---------------------------------------------|-----------|---------------------------------------|-------------|-------------------------------------------|------|---------------------------------------|------|----------------------------------------|-------|--------------------------------------|-----|--------------------------------------|---------------------------------------|---------------------------------------|
|            |                        |                           |                            |              | $\beta$ ,SE                          | $\beta$ ,SE                                 |           | $\beta$ ,SE                           |             | $\beta$ ,SE                               |      | $\beta$ ,SE                           |      | $\beta$ ,SE                            |       | $\beta$ ,SE                          |     | $\beta$ ,SE                          | $\beta$ ,SE                           |                                       |
|            |                        |                           |                            |              | <i>P</i> value                       | <i>P</i> value                              |           | <i>P</i> value                        |             | <i>P</i> value                            |      | <i>P</i> value                        |      | <i>P</i> value                         |       | <i>P</i> value                       |     | <i>P</i> value                       | <i>P</i> value                        |                                       |
|            |                        |                           |                            | SIKH         |                                      |                                             | UK<br>CVD |                                       | UK<br>TWINS |                                           | NHS  |                                       | PLCO |                                        | MDACC |                                      |     |                                      |                                       |                                       |
|            |                        |                           |                            | CEU          |                                      |                                             |           |                                       |             |                                           |      |                                       |      |                                        |       |                                      |     |                                      |                                       |                                       |
| rs74019828 | 16<br>58209274         | CSNK2A2                   | A/G                        | 0.16<br>0.03 | -0.43,0.09<br>$1.02 \times 10^{-06}$ | -0.27, 0.13<br>$2.62 \times 10^{-02}$       | 0.07      | -0.04, 0.03<br>$4.00 \times 10^{-02}$ | 0.07        | -0.03,<br>0.03*<br>$2.54 \times 10^{-01}$ | 0.07 | -0.02,0.02*<br>$2.57 \times 10^{-01}$ | 0.07 | 0.001, 0.03*<br>$9.81 \times 10^{-01}$ | 0.07  | 0.04,0.07*<br>$5.20 \times 10^{-01}$ |     | -0.38,0.06<br>$4.52 \times 10^{-08}$ | -0.06, 0.02<br>$3.20 \times 10^{-04}$ | -0.03, 0.01<br>$2.10 \times 10^{-03}$ |
| rs2098713  | 5<br>37144574          | CSorf42<br>(Near<br>TERT) | T/C                        | 0.47<br>0.35 | -0.33,0.07<br>$6.15 \times 10^{-07}$ | -0.15,0.09<br>$1.26 \times 10^{-01}$        | N/A       | N/A                                   | 0.35        | -0.01,0.01<br>$3.61 \times 10^{-01}$      | 0.39 | -0.01,0.01<br>$5.34 \times 10^{-01}$  | 0.37 | 0.02,0.02<br>$2.54 \times 10^{-01}$    | 0.35  | -0.06,.04<br>$1.29 \times 10^{-01}$  |     | -0.25,0.05<br>$3.35 \times 10^{-06}$ | N/A                                   | -0.01,0.01<br>$4.93 \times 10^{-01}$  |
| rs10004325 | 4<br>177106289         | SPATA4                    | G/C                        | 0.84<br>0.75 | -0.42,0.09<br>$6.21 \times 10^{-06}$ | -0.04,0.13<br>$7.27 \times 10^{-01}$        | N/A       | N/A                                   | 0.23        | 0.01,0.02<br>$6.85 \times 10^{-01}$       | 0.21 | 0.03,0.01<br>$2.70 \times 10^{-02}$   | 0.21 | 0.03,0.02<br>$2.63 \times 10^{-01}$    | 0.24  | 0.04,0.05<br>$3.67 \times 10^{-01}$  |     | -0.31,0.08<br>$1.95 \times 10^{-05}$ | N/A                                   | -0.02,0.01<br>$6.00 \times 10^{-02}$  |
| rs78869517 | 5<br>108050074         | FER                       | C/G                        | 0.92<br>0.94 | -0.59,0.13<br>$2.10 \times 10^{-06}$ | 0.09,0.17<br>$5.89 \times 10^{-01}$         | 0.88      | 0.01,0.03<br>$3.20 \times 10^{-01}$   | N/A         | N/A                                       | N/A  | N/A                                   | N/A  | N/A                                    | N/A   | N/A                                  |     | -0.41,0.09<br>$2.78 \times 10^{-05}$ | 0.02,0.02<br>$7.80 \times 10^{-02}$   | N/A                                   |
| rs4409879  | 12<br>27739993         | PTFIBP1                   | A/G                        | 0.17<br>0.32 | -0.45,0.09<br>$3.24 \times 10^{-06}$ | -0.08,0.13<br>$5.31 \times 10^{-01}$        | N/A       | N/A                                   | 0.29        | 0.02,0.01<br>$1.86 \times 10^{-01}$       | 0.28 | 0.002,0.01<br>$8.17 \times 10^{-01}$  | 0.27 | 0.03,0.02<br>$1.23 \times 10^{-01}$    | 0.30  | 0.001,0.04<br>$9.83 \times 10^{-01}$ |     | -0.31,0.07<br>$3.36 \times 10^{-05}$ | N/A                                   | -0.01,0.001<br>$1.37 \times 10^{-01}$ |
| rs244731   | 5<br>176539679         | unknown                   | A/G                        | 0.23<br>0.28 | 0.38,0.08<br>$2.20 \times 10^{-06}$  | 0.07,0.11<br>$4.88 \times 10^{-01}$         | N/A       | N/A                                   | N/A         | N/A                                       | N/A  | N/A                                   | N/A  | N/A                                    | N/A   | N/A                                  |     | 0.25,0.06<br>$4.82 \times 10^{-05}$  | N/A                                   | N/A                                   |
| rs9988609  | 1<br>69315228          | unknown                   | A/G                        | 0.10<br>0.11 | -0.47,0.11<br>$2.67 \times 10^{-05}$ | -0.22,0.16<br>$1.72 \times 10^{-01}$        | N/A       | N/A                                   | N/A         | N/A                                       | N/A  | N/A                                   | N/A  | N/A                                    | N/A   | N/A                                  |     | -0.36,0.08<br>$5.78 \times 10^{-05}$ | N/A                                   | N/A                                   |

All P values are two sided. CEU- Euro-Caucasians, EAF-Effect Allele Frequency, SE-Standard Error

\*data from rs1393203 is a proxy for rs74019828

**Supplementary Table 13. Nominal Association of RTL Loci and of Genetic Risk Score of Previously Identified RTL Loci with Cardiometabolic Traits**

| Cardiometabolic Trait      | SNP               | Chr | Basepair  | Imputation Info | Telomere shortening allele | other allele | Effect Allele frequency | Beta  | SE   | P      | N    | HWE  |
|----------------------------|-------------------|-----|-----------|-----------------|----------------------------|--------------|-------------------------|-------|------|--------|------|------|
| Total cholesterol (mmol/L) | rs10936599 (TERC) | 3   | 169492101 | 0.97978         | T                          | C            | 0.30                    | -4.89 | 2.01 | 0.0152 | 1507 | 0.90 |
| Triglyceride (mmol/L)      | rs10936599 (TERC) | 3   | 169492101 | 0.98095         | T                          | C            | 0.30                    | -0.06 | 0.02 | 0.0188 | 1492 | 1.00 |
| DYSBP (cases)(mmHg)        | rs2736100 (TERT)  | 5   | 1339516   | 1               | A                          | C            | 0.37                    | -1.85 | 0.67 | 0.0060 | 777  | 0.49 |
| SYBP (controls)(mmHg)      | rs2736100 (TERT)  | 5   | 1339516   | 1               | A                          | C            | 0.39                    | -3.57 | 1.19 | 0.0027 | 726  | 1.00 |
| MAP (cases)(mmHg)          | rs2736100 (TERT)  | 5   | 1339516   | 1               | A                          | C            | 0.37                    | -1.62 | 0.75 | 0.0314 | 777  | 0.49 |
| MAP (controls)(mmHg)       | rs2736100 (TERT)  | 5   | 1339516   | 1               | A                          | C            | 0.39                    | -1.80 | 0.80 | 0.0239 | 726  | 1.00 |
| PP (controls)(mmHg)        | rs2736100 (TERT)  | 5   | 1339516   | 1               | A                          | C            | 0.39                    | -2.65 | 0.85 | 0.0019 | 726  | 1.00 |
| Triglyceride (mmol/L)      | rs9420907 (OBFC1) | 10  | 105676465 | 0.98819         | A                          | C            | 0.91                    | 0.08  | 0.04 | 0.0225 | 1492 | 0.22 |

| Cardiometabolic Trait      | SNP                 | Telomere shortening allele | Beta  | SE    | P      | N    | Phet  |
|----------------------------|---------------------|----------------------------|-------|-------|--------|------|-------|
| Triglyceride (mmol/L)      | genotype risk score | yes                        | 0.16  | 0.15  | 0.2907 | 1492 | 0.057 |
| CHD                        | genotype risk score | yes                        | -0.26 | 0.79  | 0.7458 | 1604 | 0.850 |
| DYSBP_cases (mmHg)         | genotype risk score | yes                        | 6.74  | 4.34  | 0.1204 | 787  | 0.297 |
| DYSBP_controls (mmHg)      | genotype risk score | yes                        | 2.93  | 4.64  | 0.5270 | 736  | 0.343 |
| HDL-cholesterol (mmol/L)   | genotype risk score | yes                        | -1.70 | 3.36  | 0.6128 | 1490 | 0.630 |
| LDL-cholesterol (mmol/L)   | genotype risk score | yes                        | 9.52  | 9.83  | 0.3331 | 1399 | 0.652 |
| MAP_cases (mmHg)           | genotype risk score | yes                        | 6.22  | 4.86  | 0.2001 | 787  | 0.478 |
| MAP_controls (mmHg)        | genotype risk score | yes                        | 6.08  | 5.24  | 0.2457 | 736  | 0.089 |
| PP_cases (mmHg)            | genotype risk score | yes                        | -1.55 | 6.14  | 0.8006 | 787  | 0.807 |
| PP_controls (mmHg)         | genotype risk score | yes                        | 9.72  | 5.63  | 0.0839 | 736  | 0.011 |
| SYBP_cases (mmHg)          | genotype risk score | yes                        | 5.19  | 7.63  | 0.4961 | 787  | 0.771 |
| SYBP_controls (mmHg)       | genotype risk score | yes                        | 12.37 | 7.78  | 0.1118 | 736  | 0.015 |
| Total cholesterol (mmol/L) | genotype risk score | yes                        | 23.20 | 12.49 | 0.0633 | 1507 | 0.326 |

DYSBP- Diastolic Blood Pressure, SYBP- Systolic Blood Pressure, MAP- Mean Arterial Pressure, PP-Pulse Pressure, CHD - Coronary Heart Disease, HDL- High Density Lipids, LDL-Low Density Lipids, SE- Standard Error



**Supplementary Table 14A : Correlation of Beta and Power**

| Table 14A. Power to detect the association effect within a given population |        | BETA | POWER  |
|-----------------------------------------------------------------------------|--------|------|--------|
| additive                                                                    |        | 0.32 | 0.6305 |
| MAF                                                                         | 0.17   | 0.33 | 0.6967 |
| Mean                                                                        | 1.9587 | 0.34 | 0.7569 |
| Stdev                                                                       | 1.8655 | 0.35 | 0.8101 |
| N                                                                           | 4013   | 0.36 | 0.8554 |
| p                                                                           | 5E-08  | 0.37 | 0.8929 |
|                                                                             |        | 0.38 | 0.9227 |
|                                                                             |        | 0.39 | 0.9458 |
|                                                                             |        | 0.40 | 0.9631 |
|                                                                             |        | 0.41 | 0.9756 |
|                                                                             |        | 0.42 | 0.9843 |
|                                                                             |        | 0.43 | 0.9902 |
|                                                                             |        | 0.44 | 0.9941 |

**Table 14B. Sample size needed (in Caucasians) to detect significant effect of same size as sikh population**

|          |        |
|----------|--------|
| additive |        |
| MAF      | 0.07   |
| MEAN     | 1.9587 |
| Stdev    | 1.8655 |
| p        | 5E-08  |

|      | POWER | N (p=5E-08) | N (P=0.05) |
|------|-------|-------------|------------|
| Beta | 0.32  | 63%         | 8,723      |
|      |       | 80%         | 10,328     |
|      |       | 80%         | 7,318      |
|      |       | 80%         | 5,453      |
|      |       |             | 1,370      |
|      |       |             | 2,047      |
|      |       |             | 1,450      |
|      |       |             | 1,081      |

Supplementary Table 15: Association of CSNK2A2 rs74019828 snp with quantitative traits

|                              |                           | rs74019828  |                         |          |
|------------------------------|---------------------------|-------------|-------------------------|----------|
|                              | MODEL                     | BETA(SE)    | <i>P</i> (Not adjusted) | <i>P</i> |
| <b>CARDIOVASCULAR TRAITS</b> |                           |             |                         |          |
| <b>CHD</b>                   | SEX,AGE,BMI,DISEASE       | -0.02(0.15) | 8.8E-01                 | 7.3E-01  |
| <b>SYBP</b>                  | SEX,AGE,BMI,CONTROLS ONLY | 0.01(0.21)  | 8.5E-01                 | 9E-01    |
| <b>DYSBP</b>                 | SEX,AGE,BMI,CONTROLS ONLY | -0.03(0.57) | 2.3E-01                 | 2.6E-01  |
| <b>SYBP</b>                  | SEX,AGE,BMI,DISEASE       | 0.09(0.13)  | 4.2E-01                 | 3.7E-01  |
| <b>DYSBP</b>                 | SEX,AGE,BMI,DISEASE       | -0.12(0.06) | 5.8E-01                 | 4.3E-01  |
| <b>METABOLIC TRAITS</b>      |                           |             |                         |          |
| <b>T2D</b>                   | SEX,AGE,BMI               | -0.03(0.09) | 7.7E-01                 | 5.8E-01  |
| <b>T2D Onset</b>             | SEX,AGE,BMI               | 0.01(0.47)  | 7.3E-01                 | 2.1E-01  |
| <b>FBG</b>                   | SEX,AGE,BMI,CONTROLS ONLY | 0.05(0.27)  | 4.6E-01                 | 3.2E-01  |
| <b>HOMA-IR</b>               | SEX,AGE,BMI,CONTROLS ONLY | 0.03(0.33)  | 3.1E-01                 | 2.8E-01  |
| <b>FBG</b>                   | SEX,AGE,BMI,DISEASE       | 0.12(0.23)  | 1.7E-01                 | 1.1E-01  |
| <b>HOMA-IR</b>               | SEX,AGE,BMI,DISEASE       | 0.08(0.16)  | 2.1E-01                 | 1.3E-01  |

SE- Standard Error, CHD- Coronary Heart Disease, SYBP- systolic blood pressure, DYSBP-diastolic blood pressure,T2D- Type II Diabetes, FBG-fasting blood glucose, HOMA-IR- Homeostatic Model Assessment-Insulin Resistance, HOMA-β - Homeostatic Model Assessment-beta

## Supplementary Figure 1

Principle component analysis of Sikh GWAS and HapMap 3 founder populations GIH, CEU, CHB, JPT, and YRI. Eigenvectors demonstrate the close proximity of the Sikh GWAS population to the GIH and CEU populations, and the close matching of cases and controls.

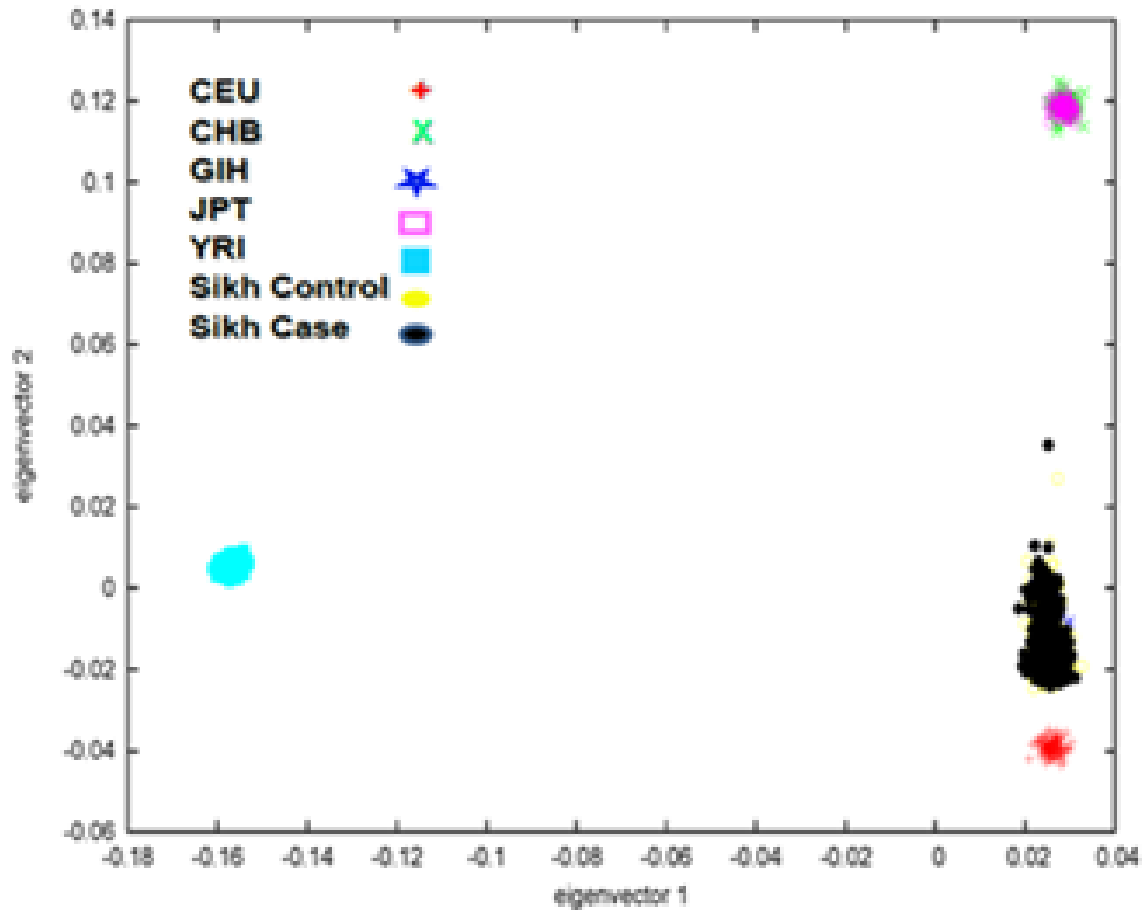

## Supplementary Figure 2

Distribution of RTL with gender in AIDHS/SDS (Discovery GWAS) and combined (Discovery and Stage 1 Replication) cohorts

### GWAS

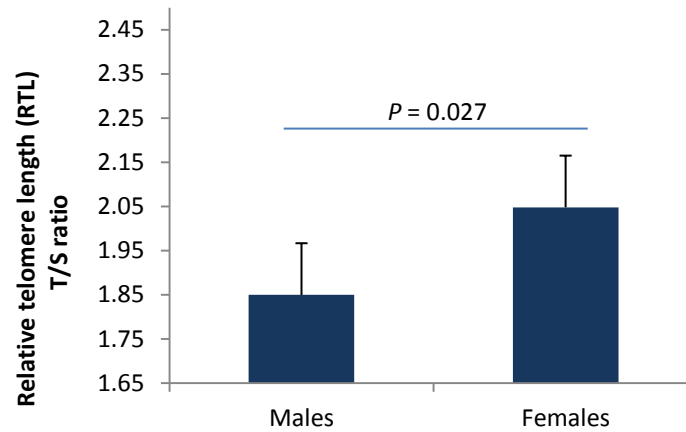

### Combined (GWAS & Replication)

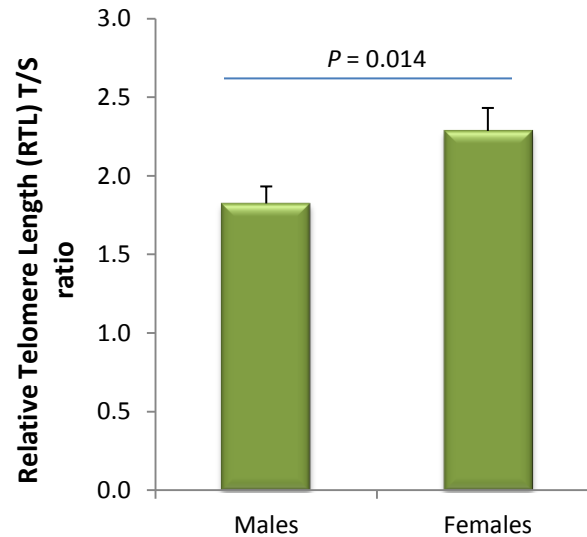

# Supplementary Figure 3

Forest plot shows significant association of previously reported genes with RTL using other variants in Sikhs.

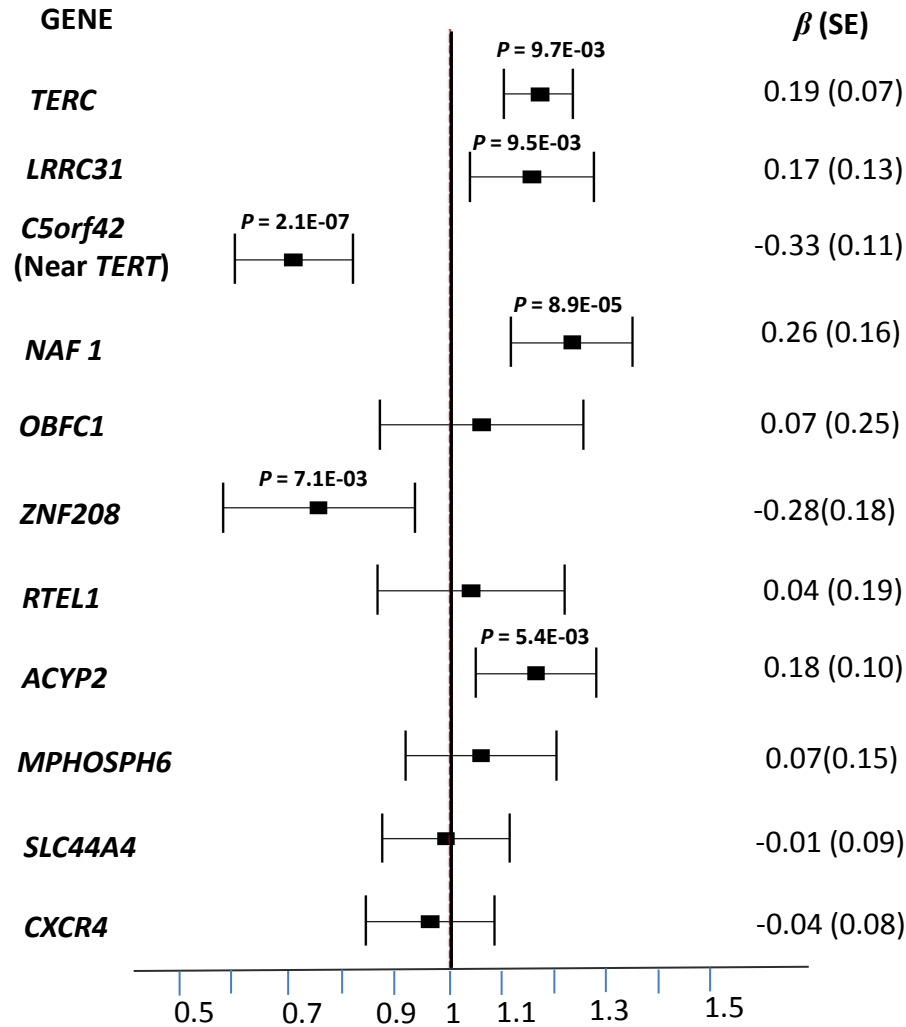

## Supplementary Figure 4

*CSNK2A2* gene locus representing the positions of key variants rs74019828 and rs1393203 in the *CSNK2A2* introns.

### *CSNK2A2*

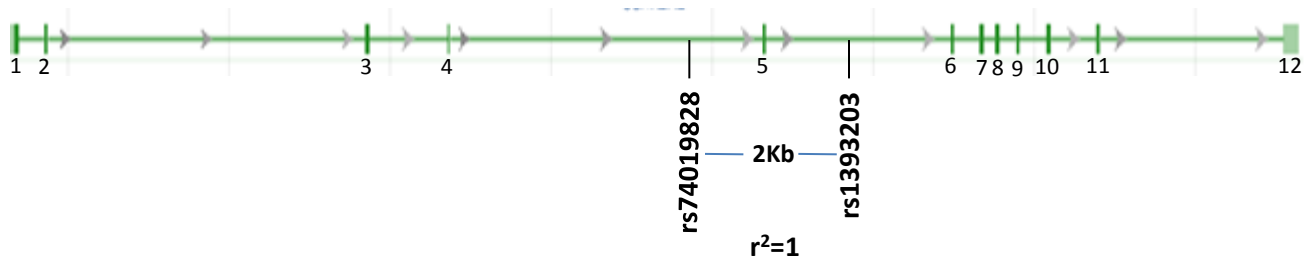

## Supplementary Figure 5

The association of *CSNK2A2* locus represented by the three top SNPs showing strong association with RTL (Meta-analysis  $P=4.4 \times 10^{-7}$ ). LD maps of the SNPs in the *CSNK2A2* locus showing patterns of pair-wise LD between Sikhs, Gujarati Indians (GIH), Caucasians (CEU), Japanese (JPT), and Africans (YRI).

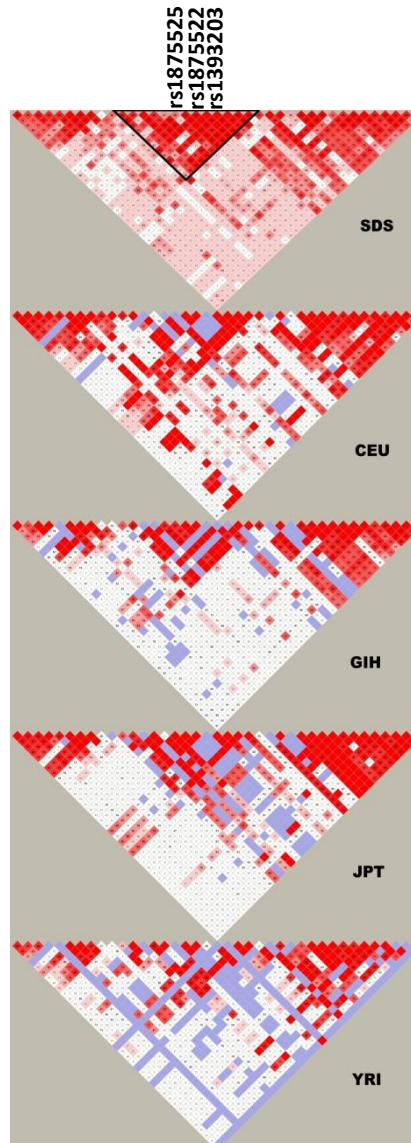

# Supplementary Figure 6

**A**

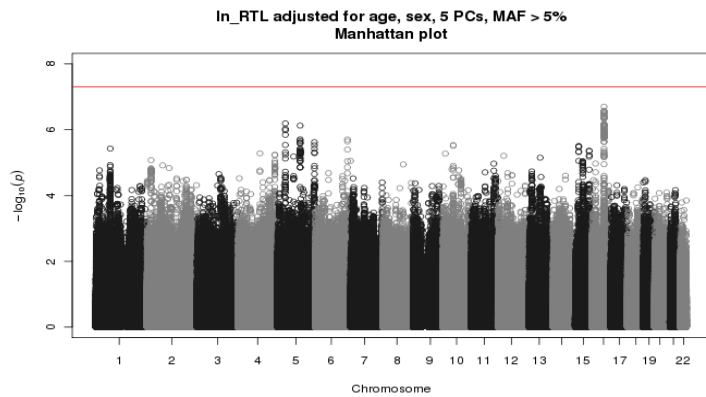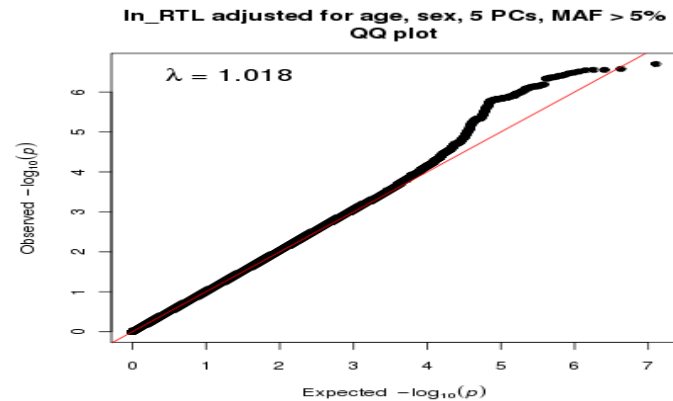

**B**

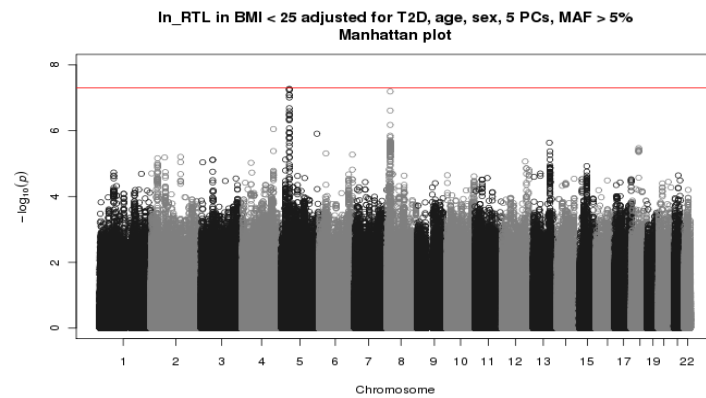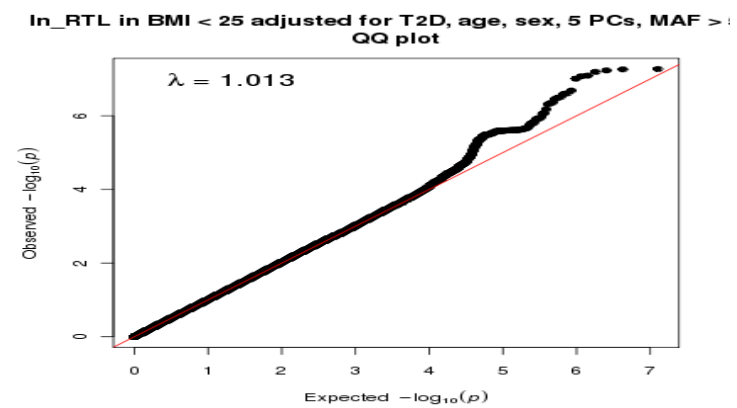

**C**

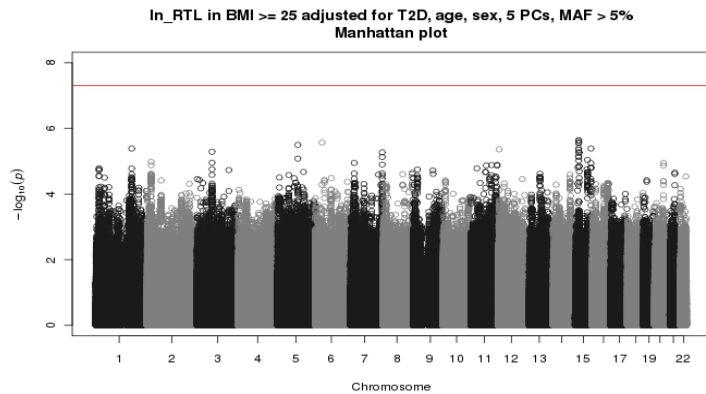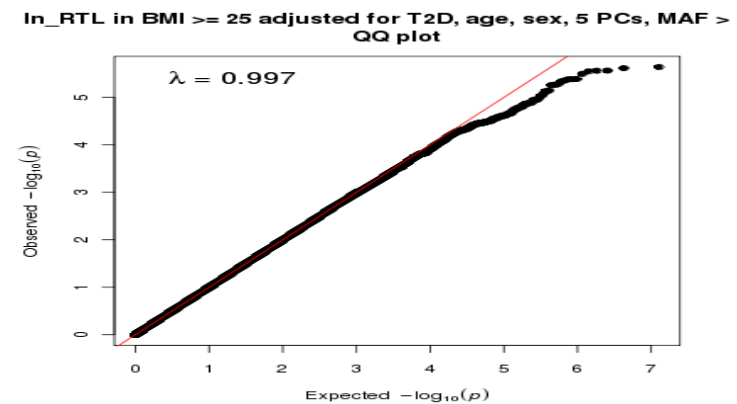

- A:** Manhattan and QQ plots displaying the association of RTL with SNPs without adjusting for Type 2 Diabetes (T2D)  
**B:** Manhattan and QQ plots showing the association of RTL with SNPs in BMI<25 adjusted for T2D, age, sex and 5 PCs  
**C:** Manhattan and QQ plots showing the association of RTL with SNPs in BMI>25 adjusted for T2D, age, sex and 5 PCs
